1 Mechanisms of antibody binding revealed by asymmetric Fab-virus complexes

2

3 Daniel J. Goetschius<sup>1</sup>, Samantha R. Hartmann<sup>1</sup>, Lindsey J. Organtini<sup>1</sup>, Heather Callaway<sup>2</sup>, Kai  
4 Huang<sup>2</sup>, Carol M. Bator<sup>3</sup>, Robert E. Ashley<sup>4</sup>, Alexander M. Makhov<sup>5</sup>, James F. Conway<sup>5</sup>, Colin  
5 R. Parrish<sup>2</sup>, Susan Hafenstein<sup>1,3,4</sup>

6

7 <sup>1</sup>Department of Biochemistry and Molecular Biology, Penn State University, W231 Millennium  
8 Science Complex, University Park, PA 16802

9 <sup>2</sup>Baker Institute for Animal Health, Department of Microbiology and Immunology, College of  
10 Veterinary Medicine, Cornell University, Ithaca, New York, USA

11 <sup>3</sup>Huck Institutes of the Life Sciences, The Pennsylvania State University, University Park,  
12 Pennsylvania, USA

13 <sup>4</sup>Department of Medicine, Penn State University College of Medicine, Hershey, PA, 17033  
14 USA

15 <sup>5</sup>Department of Structural Biology, University of Pittsburgh School of Medicine, 3501 5<sup>th</sup>  
16 Avenue, Pittsburgh, PA 15260 USA

17

18 \*Corresponding author:

19 Susan Hafenstein

20 Email: [shafenstein@psu.edu](mailto:shafenstein@psu.edu)

21

22 **Running title: Antibody-CPV capsid interactions.**

23

## 24 **Abstract**

25 Overlap on the surface of parvovirus capsids between the antigenic epitope and the receptor binding  
26 site contributes to species jumping. Mab 14 strongly binds and neutralizes canine, but not feline  
27 parvovirus. The high resolution map of the canine parvovirus capsid complexed with Fab 14 was used  
28 to solve local structures of the Fab-bound and -unbound antigenic sites extracted from the same  
29 complex. The subsequent analysis includes a new method for using cryo EM to investigate  
30 complementarity of antibody binding.

31

## 32 **Introduction**

33 Canine parvovirus (CPV) emerged as a variant of a virus in the mid-1970s, subsequently  
34 causing a pandemic of disease in dogs during 1978 (1, 2). Since that time, multiple variants have  
35 emerged with additional mutations in the viral capsid (3, 4). Extensive genetic and biochemical studies  
36 have shown that specific mutations displayed on or near the capsid surface alter the CPV binding  
37 phenotype to the host receptor, transferrin receptor type-1 (TfR). Since the specific host ranges of  
38 canine and feline parvoviruses is primarily controlled by the ability of the virus to bind TfR, changes in  
39 the binding site alter the ability of the virus to infect different hosts (3, 5, 6).

40 The virus capsid is highly antigenic, and an infection elicits many different host antibodies,  
41 which recognize specific structures on the surface of the virus that are primarily displayed as  
42 conformational epitopes. Many antibodies efficiently neutralize virus as IgGs, whereas they vary in their  
43 neutralization abilities when tested as Fabs (7, 8). In a number of cases selection of antibody escape  
44 mutations by antibodies also selects for host range variation in the viruses, while selection for host  
45 range variation also alters the antigenic structure recognized by specific antibodies. Although these  
46 changes appear to result from overlap of the receptor and antibody binding sites, it is still not clear how  
47 different selections may operate in the natural evolution of the viruses. Understanding the mechanisms  
48 of host recognition and the dynamics of the binding by antibodies and receptors would allow us to

49 predict the ability of a given virus capsid to change hosts or to escape host immunity, and to make the  
50 connections between those processes.

51 CPV has a small, 26 nm diameter, T=1 icosahedral capsid that packages a single-stranded  
52 DNA genome of about 5,000 bases. The capsid shell is comprised of VP1 (90%) and VP2 (10%), which  
53 are generated by differential mRNA splicing events so that the entire sequence of VP2 is also  
54 contained within VP1. Both proteins fold into the same eight-stranded, anti-parallel  $\beta$ -barrel structure,  
55 where the  $\beta$ -strands are connected by loops that make up the surface features of the capsid. A raised  
56 region known as the threefold spike surrounds each icosahedral three fold axis and contains most of  
57 the antigenic structures recognized by different antibodies (9, 10). MAb 14 is a mouse monoclonal  
58 antibody generated against CPV capsids that has particularly interesting properties. MAb 14 binding,  
59 hemagglutination inhibition (HAI) properties, and neutralization are all virus-strain specific, and it bound  
60 with significantly higher affinity to CPV capsids than to the closely related but host range variant virus  
61 that infected cats, feline panleukopenia virus (FPV) (11–13). The virus-specific binding of MAb is  
62 controlled by the capsid surface residue 93, which is Lys in FPV and Asn in CPV (14–16). In addition to  
63 antibody recognition, residue 93 also controls canine host range, since Asn93 allows binding to canine  
64 TfR and infection of canine cells, whereas Lys93 in the equivalent position on the FPV capsid prevents  
65 both of these processes (15).

66 Despite the central role of antibodies in protecting animals against virus infections and allowing  
67 recovery from disease, in many cases we still lack a detailed understanding of epitope characteristics,  
68 the dynamics of binding processes, and the viral neutralization mechanisms. Previous X-ray  
69 crystallography and cryo-electron microscopy (cryo-EM) structures include the Fab of MAb14 (Fab 14),  
70 virus capsids, and a Fab 14-CPV capsid complex at moderate resolution (PDB IDs 2CAS, 1C8F and  
71 3GK8) (17–19). Crystal structures of Fab 14, CPV, and FPV fitted into the cryo-EM map of Fab-virus  
72 complex have allowed us to predict protein interactions in the binding interface (19). Although this was  
73 the most rigorous approach at the time, the resulting pseudo-atomic structure based on the fitting did  
74 not explain why variation in residue 93 controlled Fab binding or identify likely mechanisms of antibody

75 neutralization. Recent technological advances in cryo-EM now allow us to solve Fab-virus structures at  
76 high enough resolution to build atomic models directly into the density map for identifying interactions  
77 unambiguously.

78         The binding and occupancy of Fabs on parvovirus have also been determined previously using  
79 charge detection mass spectrometry (CDMS), which revealed that some of the tested monoclonal  
80 antibody-derived Fabs, including Fab 14, could fully occupy all 60 epitopes of the capsid, but with some  
81 differences in the kinetics of attachment (20). Incubating with excess Fab molecules to occupy all  
82 icosahedrally-equivalent sites on capsids has long been the preferred cryo-EM structural approach  
83 since this allows icosahedral symmetry averaging to be imposed during the reconstruction process for  
84 maximizing resolution (19, 21, 22). However, there are few studies confirming the occupancies of Fabs  
85 on viral capsids, and the IgG likely does not saturate the entire surface of the capsid, so that an  
86 undersaturated capsid (with fewer than 60 bound Fab, in the case of parvoviruses) would more closely  
87 mimic a physiologically relevant setting. Solving such an asymmetric structure at atomic resolution is  
88 now possible due to advances in cryo-EM and the reconstruction approaches.

89         Here we define an atomic model of Fab 14 bound to the capsid of CPV based on cryo-EM of the  
90 complex, and examine the functional mechanisms that affect binding by testing antibody mutants. Of  
91 the two data sets used to reconstruct Fab-virus complex maps, one had close to complete occupancy  
92 of the 60 capsid epitopes, whereas the other had an average of 10 Fabs bound per capsid. These data  
93 were used to solve the icosahedrally averaged structures of fully Fab-occupied and partially Fab-  
94 occupied complexes to resolutions of 3.2 Å and 2.3 Å, respectively. An asymmetric, partially Fab-  
95 occupied virus map calculated with local reconstruction approaches attained 2.4 Å global resolution and  
96 revealed the Fab-occupied and unoccupied sites on the same virus capsid. These structures allowed  
97 unambiguous identification of residues and side chains involved in the Fab-virus binding interface and  
98 also revealed local conformational changes in the antibody binding site and capsid epitope induced by  
99 Fab binding. The partial occupancy of the capsids by Fab also provided an opportunity to develop  
100 innovative algorithms to test for complementarity of Fab binding to different positions on the capsid.

101 Notably, it was the asymmetric approach and not the traditional icosahedrally averaged reconstruction  
102 that revealed the mechanism of virus strain-specific attachment and neutralization.

103

## 104 **METHODS**

105 **Production of viruses, antibody, and Fab.** Viral capsids were produced as previously  
106 described (23, 24). Briefly, Norden Laboratory Feline Kidney (NLFK) cells were infected with FPV or  
107 CPV and incubated for 5 days. The culture supernatants were collected and clarified by centrifugation  
108 at 10,000 RPM for 15 minutes, then capsids were precipitated overnight with polyethylene glycol 6000,  
109 resuspended and banded in a linear 10% to 30% sucrose gradient at  $100,000 \times g$  for 3 hours, then full  
110 and empty capsids were collected separately. The IgGs were purified from hybridoma supernatants by  
111 Protein G chromatography, and the Fab isolated after digestion with pepsin as described previously (8).  
112 Briefly, the Fab fragment was removed by protein G binding, and the monomeric Fab isolated by size-  
113 exclusion chromatography in an S100 column.

114 **Sample preparation and data collection** Two preparations of virus capsids and Fab were  
115 incubated at room temperature for 1 hour to produce fully occupied Fab and partially occupied Fab  
116 complexes, designated full-Fab and low-Fab, respectively. Three  $\mu\text{l}$  of each incubation was applied to  
117 separate Quantifoil grids (Quantifoil Micro Tools GmbH, Jena, Germany), blotted to remove excess,  
118 and plunge-frozen into a liquid ethane-propane mixture or ethane alone using an Mk III Vitrobot (FEI,  
119 Hillsboro, OR). For the full-Fab data, the sample was applied to R2/1 grids coated with a 2nm-layer of  
120 continuous carbon, and low-dose micrographs were recorded using an FEI Polara G2 microscope  
121 operating at 300 kV in nanoprobe and a nominal magnification of 78,000x with defocus values ranging  
122 from -0.5 to -4.2  $\mu\text{m}$ . Images were collected under the software control of the EPU program using an  
123 FEI Falcon 3 direct electron detector (DED) with post-column magnification of 1.4x yielding a calibrated  
124 pixel size at the sample of 1.35 $\text{\AA}$  (**Table S1**). For the low-Fab sample, data were recorded using an FEI  
125 Titan Krios microscope operating at 300 kV and a nominal magnification of 59,000x with defocus values  
126 ranging from -0.7 to -4.9  $\mu\text{m}$ . Images were also collected under control of EPU on a Falcon 3 DED with

127 a calibrated pixel size at the sample of 1.1Å. Both data sets were recorded in movie mode by recording  
128 multiple frames corresponding to one field, allowing for correction of beam-induced movement.

### 129 **Reconstruction approaches.**

130 **Icosahedral reconstruction.** Particles were autopicked using manually selected templates and  
131 contrast transfer functions (CTF) were estimated using GCTF (25). RELION was used for motion  
132 correction, movie refinement, and particle polishing (26), whereas cryoSPARC was used for particle  
133 sorting and high resolution icosahedral refinement (27). Ctf refinement with correction for higher order  
134 aberrations was performed in RELION. Atomic models were built using Coot (28) and Phenix (29),  
135 using crystal structures 2CAS (CPV) and 3GK8 (Fab 14) as starting models (17, 19), before validation  
136 in MolProbity (30).

137 **Localized classification.** Subparticle classification was done with localized reconstruction  
138 scripts and 3D classification in RELION (26, 31). The subparticle was defined by docking a crystal  
139 structure of Fab 14 (PDB ID 3GK8) into the density map (19), and extracted using ISECC (32). These  
140 subparticles then underwent 3D classification in RELION without translations or rotations. This allowed  
141 for discrimination between Fab-occupied and -unoccupied subparticles. Subparticles were classified  
142 into six classes, resulting in strict distinction between occupied and unoccupied epitopes. There was a  
143 diversity of unoccupied states, featuring varying amounts of Fab density from the immediately adjacent  
144 epitopes (**S.Fig. 1**).

145 **Asymmetric reconstructions.** After 3D classification into 6 subparticle classes to distinguish  
146 between Fab-occupied and -unoccupied subparticles, a symmetry-break operation was accomplished  
147 using ISECC\_symbreak. For the two states, Euler angles for each subparticle were reassigned to their  
148 corresponding whole complex image. This produced two separate data files containing particle  
149 orientations (.star files), corresponding to an either Fab-occupied or -unoccupied state at a selected  
150 site. Even though there were far more Fab-unoccupied sites, in order to make valid comparisons an  
151 equal number of Fab-occupied and Fab-unoccupied subparticles were selected from each particle. This  
152 process, which we termed “particle matching”, ensured equivalent scaling of both the occupied and

153 unoccupied maps (**S.Fig. 1**). Both maps contained the same particle images, in identical numbers,  
154 differing only in the orientations. Orientations were derived from strict symmetry-expansion of the  
155 original icosahedral refinement, without local refinement, ensuring equivalent accuracy angles in the  
156 final maps. This matching approach provided equal data sets for a total of 1,657,372 particle-  
157 orientations per reconstruction. DeepEMhancer was used to improve local sharpening of maps during  
158 post-processing (33). Difference maps were calculated by subtracting the Fab-occupied and  
159 unoccupied maps in EMAN (34).

160 **Correlated local classification.** To describe the configuration of individual bound Fab  
161 molecules on each Fab-virus complex, we implemented a system analogous to a radial distribution  
162 function (RDF). Each component of the RDF represents the 3D distance between occupied sites on the  
163 capsid, as determined by 3D classification and the vectors used in subparticle extraction. On a per-  
164 virus basis, the distance between each pair of subparticles was calculated, yielding a list of  $(n^2-n)/2$   
165 distances, where  $n$  = the number of Fab molecules bound to the given complex. Fab binding patterns  
166 were derived by normalizing the observed RDFs to a hypothetical particle with all binding site occupied.  
167 This combined novel approach was termed correlated local classification. The custom software  
168 package, ISECC (icosahedral subparticle extraction & correlated classification), is available for  
169 download at <https://github.com/goetschius/isecc>.

170 **Design of scFv-Fcs, mutagenesis, and binding assays.** The heavy and light variable chains  
171 of Mab14 (43) were joined by a linker sequence of  $3 \times (\text{Gly, Gly, Gly, Ser})$  to prepare a single chain  
172 variable fragment (scFv), and cloned behind the gp68 signal sequence. This was linked through an  
173 additional flexible linker containing a thrombin cleavage site to the Fc portion of human IgG1, and a C-  
174 terminal 6-His tag added (35). Residues changed in the antigen binding region of the scFv included  
175 those predicted to be directly interacting with the viral capsid, or to be interacting with capsid residues  
176 that control specific Mab14 binding, including capsid residue 93 (19). Mutagenesis was conducted  
177 through the use of Phusion Site-Directed Mutagenesis Kit (Thermo Fisher Scientific, Waltham, MA).  
178 Bacmids were produced through recombination between the DH10Bac (Invitrogen) vector and the

179 pFastbac donor plasmids. Sf9 insect cells (Invitrogen) were then transfected with the bacmids to  
180 produce the initial stock of baculovirus. Proteins were expressed from High Five cells over five days  
181 incubation at 28°C. The culture supernatant was centrifuged at 10,000 RPM for 30 min before being  
182 dialysed into 50 mM Tris-HCl, 150 mM NaCl, 0.05% NaN<sub>3</sub>, (pH 7.5). The scFv-Fc was isolated with a  
183 Protein G column, then passed through a Sephacryl S-200 chromatography column in PBS (GE  
184 Healthcare, Piscataway, NJ), and the protein in the monomeric protein peak was collected.

185 The BLItz system (ForteBio, Menlo Park, CA) was used to measure binding kinetics, using  
186 Protein A biosensors which were first blocked with kinetics buffer (PBS with 0.01% BSA, 0.02% Tween  
187 20, 0.005% NaN<sub>3</sub>). Incubations included 300 secs baseline, 300 secs loading, 60 secs baseline, 300  
188 secs association, and 300 secs dissociation. Antibodies were tested at various dilutions, and used at  
189 their optimum loading concentration. Viral capsids were added at 0.3 mg/mL. The BLItz Pro software  
190 (ForteBio) was used to analyze the data, and statistical analyses of binding assays were conducted  
191 with GraphPad Prism 5 (GraphPad Software, Inc., La Jolla, CA). Error bars on **Fig. 5** represent the  
192 mean ± SEM obtained through multiple independent experiments.

193

## 194 **RESULTS**

195 **Independent CPV and Fab 14 incubations generated complexes with complete and partial**  
196 **Fab occupancies.** Here we examine and compare the results obtained from two separately prepared  
197 datasets of Fab 14-CPV complexes. As can be seen in the micrographs (**Fig. 1**), one of the resulting  
198 complexes had near-saturation of the Fab binding sites, whereas the other showed only partial Fab  
199 occupancy. The complete Fab occupancy, defined as close to 60 Fab 14 molecules bound per capsid,  
200 was termed “full-Fab” and allowed icosahedral symmetry averaging to reveal bound Fab. The partial  
201 Fab occupancy of binding sites, described as fewer than ~20 Fab 14 molecules per capsid, was called  
202 “low-Fab” and was used for an initial icosahedrally averaged reconstruction, that was followed by an  
203 asymmetric exploration of the complex and the development of algorithms to assess binding patterns.



204           **Reconstruction of the full-Fab data.** Using icosahedral symmetry averaging in cryoSPARC,  
205 the full-Fab data were refined to a 3.2 Å resolution map (**Fig. 1 and S.Fig 2**) (27). The crystal structures  
206 for Fab 14 (PDB ID 3GK8) (19) and the CPV capsid (PDB ID 2CAS)(17) were fitted into the  
207 corresponding densities to initiate the builds followed by manual adjustment in COOT and simulated  
208 annealing in PHENIX. The resulting capsid structure superimposed on 2CAS with an RMSD of 0.503  
209 (with C-alpha), with the only significant difference mapping to loop 228 (His 222 - Thr 230) in the virus  
210 structure. All other areas that worsened the RMSD were the result of other flexible loop movements  
211 during simulated annealing in the weak density of fivefold loop residues 156-162, as well as residues  
212 360-375 and 510-520. The only substantial change between the crystal structures and the cryo-EM  
213 density was in the binding interface, where Fab residues 100 and 101 were out of density. This  
214 discrepancy corresponds to a polymorphism of Fab 14 residue 100 in the H chain, which was identified  
215 as Phe in the original Fab sequence (19); however, a Ser was identified in this position on  
216 resequencing of the variable domain (**Table S2**). The density in our structure supports the assignment  
217 as Ser 100. After changing the identity of the side chain, Ser 100 and His 101 were adjusted to fit into  
218 the Fab density within the complex. With these modifications, no other significant density differences  
219 were interpreted in the binding interface, and the fitted Fab crystal structure was used without further  
220 refinement for interpretations.

221           Local resolution mapping showed that the capsid shell had somewhat better resolution than the  
222 bound Fab, which likely correlates to slight flexibility. Virus-to-Fab contacts were identified as residues  
223 having atoms separated by less than 0.4 Å van der Waal's radius (36). The newly identified Fab 14  
224 footprint is different than what was estimated previously from the 12 Å resolution capsid-Fab structure  
225 (19) (**Table 1**). The main interface interactions took place between capsid surface loops containing  
226 residues 93 and 228 that interacted with CDRs H2 and 3 and L1 of the antibody.

227           **Reconstruction of the low-Fab data.** In an initial step, the low-Fab data were reconstructed  
228 while imposing full icosahedral symmetry, which resulted in a 2.3 Å resolution map (**Fig. 1**). As  
229 expected, the low occupancy of Fab resulted in weak density due to the 60-fold averaging of the fewer

230 than 60 Fab molecules per capsid. Consequently the Fab structure could not be interpreted. The capsid  
231 build was initiated with the fitted crystal structure (PDB ID 2CAS) and further refined in Phenix (17, 29).  
232 Unresolved regions included the 226-228 loop where the density was non-continuous, weak, and  
233 uninterpretable.

234 **An asymmetric reconstruction of the low-Fab data resolved the bound Fab and allowed**  
235 **the Fab structure to be built in the context of the virus.** Using the icosahedrally-averaged  
236 reconstruction of low-Fab data as a starting point, an asymmetric reconstruction was done to resolve  
237 the Fab density in the context of the whole capsid. Subparticle extraction and 3D classification were  
238 performed to classify subparticles as either Fab-occupied or -unoccupied (**Fig. 1 and S.Fig. 1**),  
239 showing that an average of 10 Fab were bound per capsid in the low-Fab data. The results of  
240 subparticle classification were used to generate an asymmetric map after superimposing all the Fab  
241 density in a standard orientation (ISECC\_symbreak), resulting in a final asymmetric map at 2.4 Å global  
242 resolution (**Fig. 1 and S.Fig. 2**). In this asymmetric map, the virus-Fab interface had stronger density at  
243 higher resolution than the icosahedrally-averaged full-Fab map (**S.Fig. 3**). The Fab 14 crystal structure  
244 was fitted to initiate the build with the identity of residue 100 corrected from Phe to Ser, as above, and  
245 additional refinement was done in COOT and PHENIX (28, 29).

246 **Both Fab-occupied and unoccupied virus capsid structures were reconstructed.** To  
247 compare directly the Fab-occupied and -unoccupied structures, a matched map was generated from  
248 the same particles, orienting them to feature no Fab density at that same location (**Fig. 1**). Direct  
249 comparability was maintained between the two asymmetric reconstructions, such that individual  
250 particles contributed equally to both maps, differing only in their orientations. For example, if particle A  
251 was determined to possess eleven Fab molecules, it was incorporated in only eleven orientations in  
252 both maps, by discarding the surplus unoccupied sites. This selection criteria ensured that particles  
253 contributed equally to both reconstructions, a process we termed “particle matching.” The resulting 2.4  
254 Å resolution asymmetric map resolved the unoccupied Fab-binding site.

255           **The Fab-occupied and -unoccupied capsid epitopes differ at the 228 loop.** To test for local  
256 conformational changes induced by bound Fab, a difference map was calculated between the particle-  
257 matched asymmetric reconstructions of Fab-bound and -unbound epitopes (**Fig. 2a**). In addition to the  
258 expected Fab difference density, there was significant capsid difference density corresponding to virus  
259 loop 228 in the Fab binding interface. As described above, the fitted crystal structure of the capsid  
260 protein (PDB ID 2CAS) was refined in COOT and PHENIX for the Fab-bound and -unbound maps  
261 (**Table S3**) (17). Inspection of the bound- and un-bound models suggests a hinge-like motion of the 228  
262 loop (1.9 Å maximum C $\alpha$ -C $\alpha$  displacement), which makes room for Fab heavy chain residue His101  
263 (**Fig. 2b and S.Movie 1, 2**). The bound and unbound structures superimposed with a C $\alpha$  RMSD of  
264 0.200Å, indicating minor variation between the two structures due to reconfiguration of residues 226-  
265 229 in the Fab interface.

266           **The Fab footprint identified using the asymmetric map is nearly the same as the footprint**  
267 **identified using the icosahedrally averaged map.** After Fab and capsid structural refinement,  
268 residues in the interface were defined as contacts using the same method as with the full-Fab  
269 icosahedrally averaged map (**Table 1**). Predicted contacts in the 222-229 loop were identical in both  
270 the 3.2 Å and 2.4 Å resolution maps. For the 87-93, 305-309, and 422-427 loops, the improved  
271 resolution of the asymmetric map moved a few residues (Met87, Ala91, Gly307, Leu 422, Pro423)  
272 either in or out if the strict contact criteria cutoff (**Table 1, Fig. 3**). Virus capsid residues 93, 222, and  
273 224 identified in the footprint have also been shown previously to influence Mab14 binding and  
274 identified as selected escape mutations (11, 12, 15, 16). Local resolution mapping showed small  
275 improvements in resolution of the surface epitope upon Fab binding, including residues 423-426, 88-93,  
276 and 309 (**Fig. 4**). Residues not involved in direct Fab interaction had similar local resolution in the two  
277 maps, suggesting that Fab-binding stabilizes loop in the epitope by interacting with and burying the  
278 capsid surface.

279           **Targeted mutations inhibit Fab 14 binding.** Mutations of the virus that influenced Mab14  
280 binding were identified in previous studies as residues 93, 222, and 224 (11, 12, 15, 16). Specifically a  
281 change in Asn93 abrogated binding as demonstrated by the diminished ability of FPV (Lys 93) to bind  
282 Mab 14. Mutations G224R, G224E, and H222Y have also been known to interfere with the Mab14  
283 binding. For further testing, the Fab 14 was expressed as an scFv-Fc, which allowed us to examine its  
284 binding to the capsid, and to create mutations in selected CDR loops. The scFv-Fc bound to CPV  
285 capsids to a higher level than to FPV capsids (**Fig. 5**), as expected due to the known specificity of the  
286 virus for CPV (11, 16). Mutations in two different loops within the complementarity determining regions  
287 (CDRs) of the antibody resulted in greatly reduced binding to CPV (and even less binding to FPV),  
288 confirming that those were involved in critical contacts in the binding of the antibody to the capsid (**Fig.**  
289 **5**).

290           To predict the effect of the FPV-encoded Lys at position 93 on the antigenic epitope, the FPV  
291 and CPV crystal structures were fitted into the Fab-bound density map for comparison. The longer side  
292 chain of Lys 93 in FPV followed the same trajectory as that of Asn 93 of CPV, but extended out of cryo-  
293 EM density, and has been predicted to form two hydrogen bonds to the carbonyl oxygen atoms of  
294 residues Thr 225 and Gly 227 (37). The 228 loop is immediately adjacent to residue 93 (**Fig. 4c-d**). In  
295 the crystal structures of CPV and FPV that were not antibody bound, the loop containing residue 228  
296 extended out of density when compared to that seen in the Fab-bound structure, consistent with the  
297 ordering of the 228 loop due to Fab binding.

298           Other differences in the Fab binding interface of CPV compared to FPV were investigated by  
299 mapping the electrostatic surface potentials to understand how the Lys (FPV) or Asn (CPV) at residue  
300 93 might alter the surface charge. There was positive charge at the Fab surface where it interacts with  
301 virus residue 93, consistent with a favorable CPV and impaired FPV interaction, due to the positively-  
302 charged Lys 93 of FPV (**Fig. 6**).

303           **Correlated local classification provides a Fab fingerprint of the complex.** For the low-Fab  
304 dataset, each individual complex was analyzed to identify which of the 60 binding sites were occupied

305 by Fab relative to each other on the same virus capsid. After extraction and classification of the  
306 originally defined subparticle (see above), the Fab-occupied particles were identified per complex. Each  
307 complex was defined according to the 3D binding of Fab molecules relative to each other in the context  
308 of the capsid, which we termed “Fab fingerprint” (**Fig. 7**). This fingerprint is effectively a binarized  
309 version of a radial distribution function (RDF), consisting of the center-of-mass distances between all  
310 Fab-occupied subparticles. These per-particle Fab fingerprints were pooled and normalized against a  
311 hypothetical fully saturated particle. The normalized RDF plots can reveal deviation of the dataset from  
312 expected, random-chance binding patterns.

313 Over the entire low-Fab dataset, Fab 14 binding patterns largely matched random-chance  
314 predictions, but with a slight excess of the proximal RDF components, corresponding to increased  
315 binding events among nearby sites (**Fig. 7, upper panel**). Thus, our analysis suggested that there  
316 might be binding cooperativity of Fab 14 molecules at the local level, since they tend to cluster on the  
317 capsid rather than disperse randomly across the 60 symmetry-related epitopes.

318 For comparison we used the same correlated local classification method to calculate fingerprints  
319 for another Fab-CPV complex. That previously determined cryo-EM structure showed that the Fab of  
320 monoclonal antibody E (Fab E) recognized a different epitope on the capsid located close to the two-  
321 fold axis, with moderate clash between symmetry-related Fabs (38). The virus-Fab E map central  
322 section revealed a magnitude of Fab E density less than half that of the capsid itself. As expected,  
323 correlated local classification showed a strong deficit of the most proximal RDF component, consistent  
324 with steric clash of Fab E molecules across the twofold symmetry axis. All other RDF components  
325 matched expected values (**Fig. 7, lower panel**). This negative cooperativity contrasts with the modest  
326 positive local cooperativity observed with Fab 14. Residual signal from the twofold Fab E RDF  
327 component may be due to low levels of classification error in the modest resolution dataset.

328 To further validate RDFs as a tool for correlated classification, two undersaturated enterovirus-  
329 Fab complexes were analyzed, one without any steric clashes induced by Fab binding, and the other  
330 complex featuring strong steric collisions about each threefold symmetry axis (**S.Fig. 4**). The behavior

331 of CPV-Fab14 matched that of the clash-less enterovirus-Fab complex. Likewise, the behavior of CPV-  
332 FabE matched that of the enterovirus-Fab complex with the threefold symmetry clash. These results  
333 establish correlated classification as a tool for detecting and quantifying cooperativity of Fab binding.  
334

## 335 **DISCUSSION**

336 The small and seemingly simple parvovirus capsid performs many different functions in the  
337 process of packaging the ssDNA genome, trafficking between cells and animals, and entry into a  
338 permissive host. Critical events include effective receptor binding, endocytosis and transport of the  
339 genome to the nucleus, as well as binding and potential evasion of the host antibody response.  
340 Interactions with antibodies require recognition and attachment to epitopes displayed on the assembled  
341 virus capsid, which may lead to neutralization of infection or select for antigenic variation of the virus.  
342 The relationships between antibody binding sites and evolution that results in antibody escape, are  
343 complicated by the overlap with receptor binding sites needed for cell infection. Here we used multiple  
344 approaches to analyze the Mab14 that binds to the CPV capsid at a position that also controls TfR  
345 recognition and the viral host ranges. The results of this study explained the specificity of binding to  
346 CPV compared to FPV and also revealed Fab binding patterns.

347 The traditional structural approach to reveal a specific interaction on the surface of an  
348 icosahedral virus is to saturate all the potential binding sites on the capsid by incubating purified  
349 particles with excess protein. This forced symmetry approach often results in a virus-protein complex  
350 that is coated with protein and allows for icosahedral symmetry averaging during the reconstruction  
351 process. The averaging often allows higher resolution to be achieved, but various factors may limit  
352 success, including low affinity and steric collisions of symmetry-related bound molecules or bulky  
353 proteins. However, complexes made with full occupancy of host protein binding sites on icosahedral  
354 viruses may poorly represent *in vivo* virus host interactions, which are more often asymmetric or  
355 heterogeneous.

356 Using asymmetric reconstruction and innovative subparticle classification techniques, we were  
357 able to use a single data set to solve the structures of Fab-bound and unbound epitopes within the  
358 same complex. The local conformational changes to the virus capsid which may be induced by Fab  
359 binding (**Fig. 2, 4, S.Movie 1, 2**) might contribute to host range or tropism, along with the difference in  
360 surface charge displayed by the Asn (CPV) and Lys (FPV) at VP2 residue 93. At the local resolution of  
361 this region (~2.8 Å) movement of the 228 loop by 1.9 Å is not definitive, however this loop shows higher  
362 B factors in the crystal structures of CPV than FPV, supporting flexibility (PDB IDs 2CAS, 1C8D,  
363 4DPV)(17, 18, 39). Host range specificity for CPV and FPV is controlled by residues 93 and 323 of the  
364 major capsid protein (16) that together allow specific binding of canine TfR, which is not recognized by  
365 FPV (40).

366 **Antibody binding and specific recognition.** As expected, the footprint revealed by our atomic  
367 resolution model differs from that estimated previously from a 12 Å resolution structure (19), and we  
368 now have an unambiguous definition of the interaction site. The movement or ordering of the residues  
369 comprising loop 228, which may be essential for high affinity Fab 14 binding, appears to represent a  
370 case of induced fit resulting from the binding, as has also been seen in many other antibody binding  
371 interactions (41–43). Other host protein binding events that induce local conformational changes in  
372 virus capsids may have been missed due to structural approaches that have focused on making  
373 complexes by fully saturating all potential binding sites and imposing icosahedral symmetry averaging  
374 during the reconstruction process.

375 The structures derived from the Fab-bound and unbound asymmetric maps also suggest a  
376 model for how the sidechain of residue 93 controls species-specific binding. Compared to CPV (PDB ID  
377 2CAS), the FPV loop 228 (PDB ID 1C8F) is positioned further away from the main part of the  
378 conformational epitope and also stabilized due to the Lys 93 sidechain and the new bonds that are  
379 formed with the carbonyl oxygen atoms of residues Thr 225 and Gly 227, and those effects would  
380 clearly reduce Fab 14 recognition of FPV. In addition, local charge differences may play a role in  
381 controlling specific antibody binding due to the positively charged patch on Fab 14 that correlates to the

382 interaction with virus residue 93. The previously mapped escape mutations such as His 222 also  
383 support this model overall, due to interactions with the 426 loop of the neighboring capsid protein  
384 subunit, which itself possesses two residues involved in Fab binding (Thr 425, Asn 426). Mutation of  
385 Fab-buried residue Gly 224 likely directly interferes with Fab binding via steric interference. Thus the  
386 identified mutations may directly block Fab binding or they may alter the configuration of loops within  
387 the Fab footprint. We also confirmed key interactions associated with the antibody structure by mutating  
388 two CDR loops and expressing the protein as scFvs linked to the Fc of human IgG1. Those changes in  
389 light chain CDR2 (Ser50Gly and Asn53Gly) and heavy chain CDR3 (Gly316Ala) reduced the binding to  
390 both CPV and FPV capsids.

391 **The local classification and correlation approach revealed additional details compared to**  
392 **simple icosahedral averaging.** Besides the structural solution, we used the low-Fab dataset to reveal  
393 positive or negative cooperativity in the binding of two different Fabs that bound to different capsid  
394 positions (**Fig. 7**). The use of local classification was an innovative and powerful approach to analyzing  
395 the data, and may have many uses in analysis of these and other symmetrical virus structures.  
396 Implementing an RDF-style analysis of the low-Fab complexes allowed interpretation of Fab binding  
397 patterns, conclusively establishing steric collision in cases of suspected atomic clash, and suggesting  
398 positive cooperativity where symmetry clash is not a factor. This also suggests value in purposely  
399 obtaining undersaturated occupancies of host protein molecules on a virus particle, to allow the direct  
400 comparison of occupied and unoccupied binding sites.

401 Importantly, correlated local classification is dependent on the accuracy of classification results.  
402 Negative local cooperativity due to steric clash is seen in the deficit of proximal components in the RDF  
403 plots, whereas positive cooperativity is suggested by an excess of proximal components. However,  
404 both situations exist in the presence of systematic classification error, and become compelling with the  
405 addition of supporting data, repeatability, and comparison with different virus-Fab complexes. Analysis  
406 of additional complexes should reveal common patterns of binding behavior, helping establish the  
407 threshold for distinguishing true biophysical phenomena from low-level classification error.



408 Overall this study confirmed that the binding of an antibody with a capsid is a complex process  
409 involving multiple loops of the antibody and virus. Capsid changes that have been selected as host  
410 range mutations also alter antibody binding, confirming that single point mutations on either the capsid  
411 or antibody are sufficient to prevent attachment (16, 44, 45). We were also able to develop innovative  
412 approaches to analyze partially occupied capsids and understand the patterns of Fab binding using a  
413 cryo-EM structure.

414

#### 415 **ACKNOWLEDGMENTS**

416 Funding was provided by the Pennsylvania Department of Health CURE funds. Research  
417 reported in this publication was supported by the Office of the Director, National Institutes of Health,  
418 under Award Numbers S10OD019995 (JFC) and S10RR031780 (SH), as well as NIH grants  
419 R01AI107121 (SH), R01AI092571 (CRP), and T32CA060395 (LJO).

420

421 **Accession numbers:** The cryo-EM maps of the icosahedrally refined Low-fab and Full-fab CPV  
422 complexes, and asymmetric Fab-occupied and -unoccupied maps are deposited in the EM data bank  
423 ([www.emdatabank.org/](http://www.emdatabank.org/)) under accession numbers EMD-XXXX, XXXX, XXXX, and XXXX. Models built  
424 for the fab are deposited in the PDB under ID YYYY and YYYY respectively, and models built for the  
425 fab-unoccupied and -occupied virus are deposited under YYYY, and YYYY respectively.

426

427 **TABLES**

428

429

430 **Table 1:** Footprint of Fab 14 on CPV capsid

431

| Molecule    | Loop    | Residue | 2.4Å asymmetric map | 3.2Å icosahedral map | 12Å map Hafenstein 2009 |
|-------------|---------|---------|---------------------|----------------------|-------------------------|
| CPV chain 1 | 87-93   | MET 87  |                     | X                    |                         |
|             |         | ASP 88  | X                   | X                    | X                       |
|             |         | LYS 89  | X                   | X                    | X                       |
|             |         | ALA 91  | X                   |                      |                         |
|             |         | VAL 92  | X                   | X                    |                         |
|             |         | ASN 93  | X                   | X                    | X                       |
|             | 222-229 | HIS 222 | X                   | X                    |                         |
|             |         | THR 223 | X                   | X                    | X                       |
|             |         | GLY 224 | X                   | X                    | X                       |
|             |         | THR 225 | X                   | X                    | X                       |
|             |         | SER 226 | X                   | X                    |                         |
|             |         | GLY 227 | X                   | X                    | X                       |
|             |         | THR 228 | X                   | X                    |                         |
|             |         | PRO 229 |                     |                      | X                       |
| CPV chain 2 | 305-309 | ASP 305 |                     |                      | X                       |
|             |         | ILE 306 |                     |                      |                         |
|             |         | GLY 307 |                     | X                    |                         |
|             |         | VAL 308 | X                   | X                    |                         |
|             |         | GLN 309 | X                   | X                    |                         |
|             | 422-427 | LEU 422 |                     | X                    | X                       |
|             |         | PRO 423 | X                   |                      | X                       |
|             |         | THR 425 | X                   | X                    | X                       |
|             |         | ASN 426 | X                   | X                    |                         |
|             |         | ASP 427 | X                   | X                    | X                       |

432

433

434 **Figure legends**

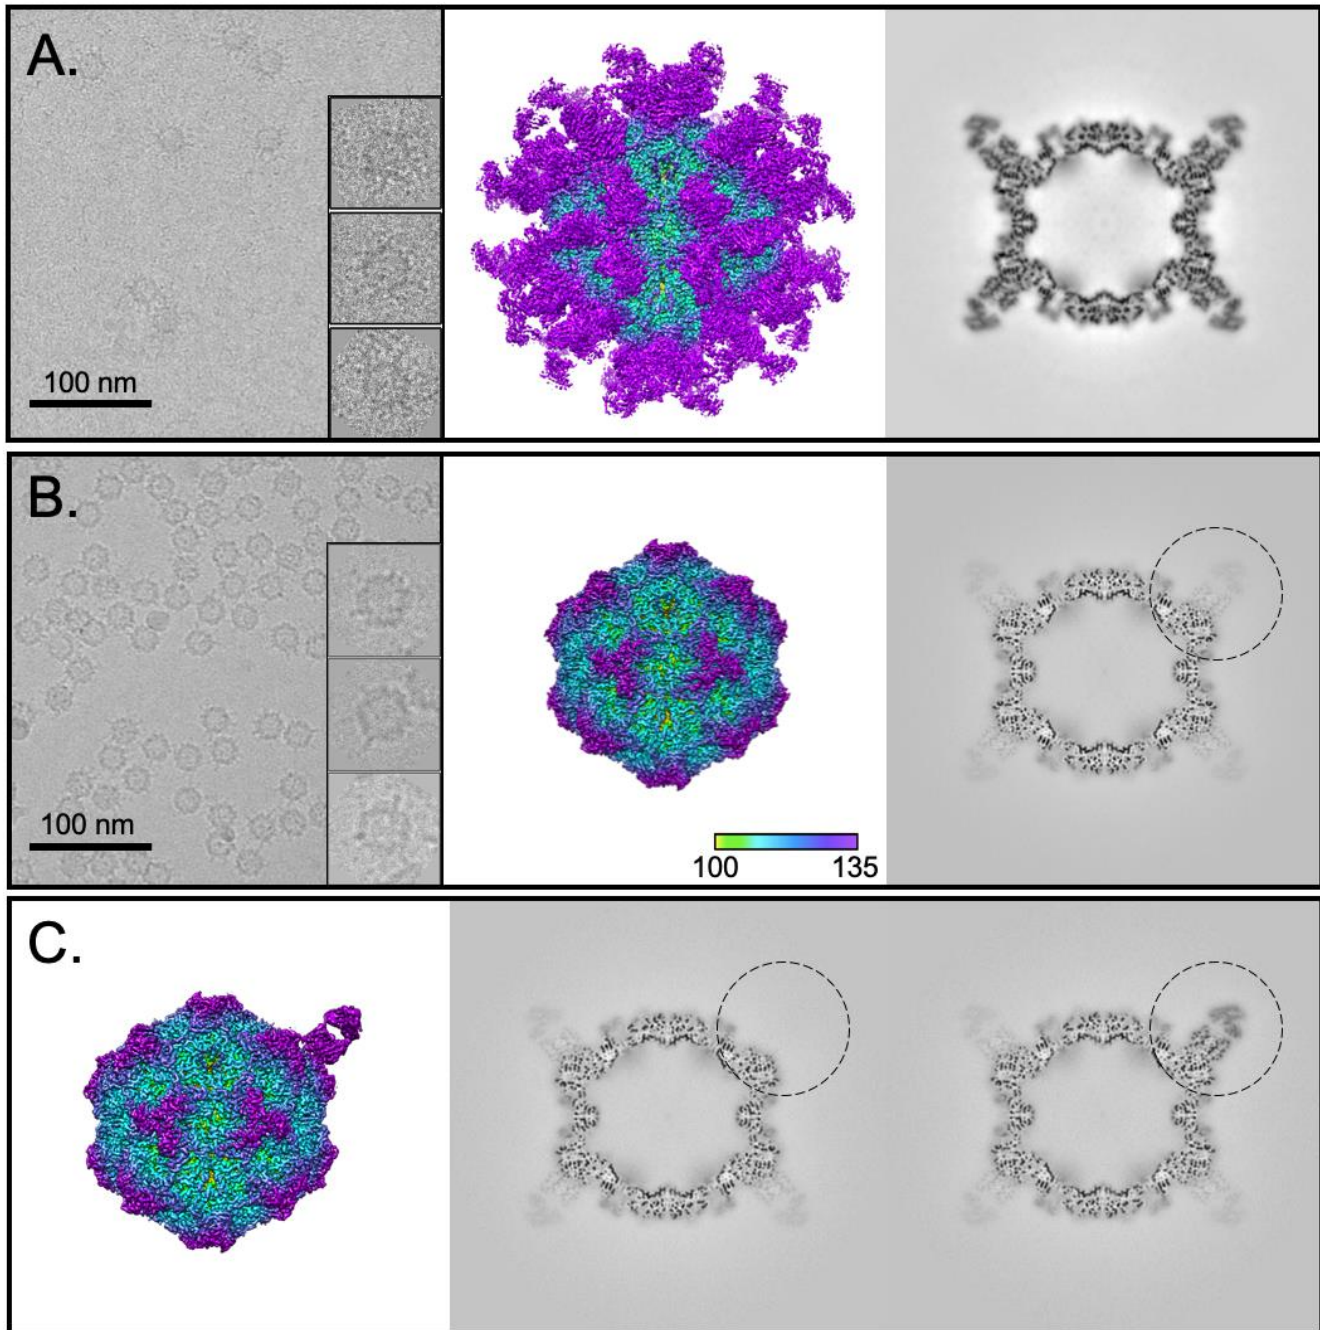

435

436 **Figure 1. Full-Fab and low-Fab data reconstructed with and without icosahedral symmetry**

437 **averaging.** A and B) (Left) In the cryo-EM micrographs, an excess of Fab in the incubation results in

438 Fab attached to most capsid binding sites, which can be seen as full-Fab complexes that have a

439 spidery appearance. In comparison, complexes resulting from lower ratio of Fab:virus incubation have

440 obvious low fab occupancy. Scale bar is 100nm. (Center and right) The 3.2Å and 2.3Å icosahedrally  
441 averaged cryo-EM maps of Fab 14 - CPV full-Fab and low-Fab complexes are surface rendered and  
442 colored according to radius, with key inset. The central section of each corresponding map shows the  
443 magnitude of Fab density relative to that of the capsid. (C) Asymmetric reconstruction of low-Fab data  
444 using localized classification approach. Although there were many more Fab-unoccupied particles per  
445 particle, we intentionally selected only as many Fab-unoccupied subparticles as there were Fab-  
446 occupied subparticles from each particle. (Left) 2.4Å surface rendered asymmetric map is colored  
447 according to radius (as above) and shown with (center and right) the central sections of the fab  
448 unoccupied and occupied subparticles (black circle) in the context of the capsid. The low magnitude  
449 Fab density seen in other positions in the central section corresponds to an average of the other 10 Fab  
450 molecules averaged over the remaining 59 sites.

451

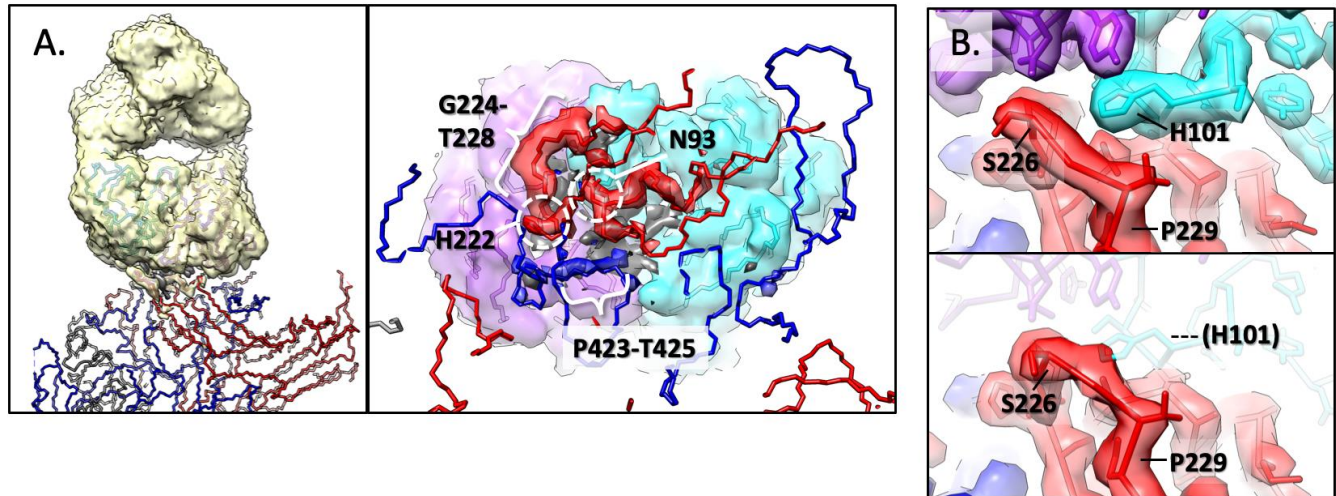

452

453 **Figure 2. Fab-virus interface and interactions.**

454 (A, Left) Difference mapping showing all positive density (taupe) most of which corresponds to Fab14;  
455 however, there is additional positive (taupe) and negative (dark grey) density located at the Fab-capsid  
456 interface. Two copies of the VP2 capsid protein (red and blue wire) comprise the binding site. (Right)  
457 Map of interface is rotated 90° with the virus slabbed to show the interface and Fab heavy (cyan) and  
458 light chains (purple) surface rendered. This zoomed view illustrates positive difference density (red and  
459 blue) corresponding to the virus loops. In the absence of Fab some virus density is discontinuous and  
460 cannot be built (dashed lines). The positive difference density corresponds to capsid residues 88-94,  
461 222, 224-228, and 423-425 (colored by nearest chain). Negative difference density (dark grey) can be  
462 seen adjacent to the positive difference density. (B) Zoomed image of the virus (red and blue) and Fab  
463 (purple and cyan) interface. The VP2 228 loop is displaced by a maximum of 1.9Å upon interaction with  
464 Fab heavy chain residue H101 (top vs bottom). This same view is provided as a morph-map in S.Movie  
465 2.  
466  
467

### RIVEM : Radial Interpretation of Virus Electron-density Map

Version 4.5

River, 10/24/2005, Last Modified 05/08/2008

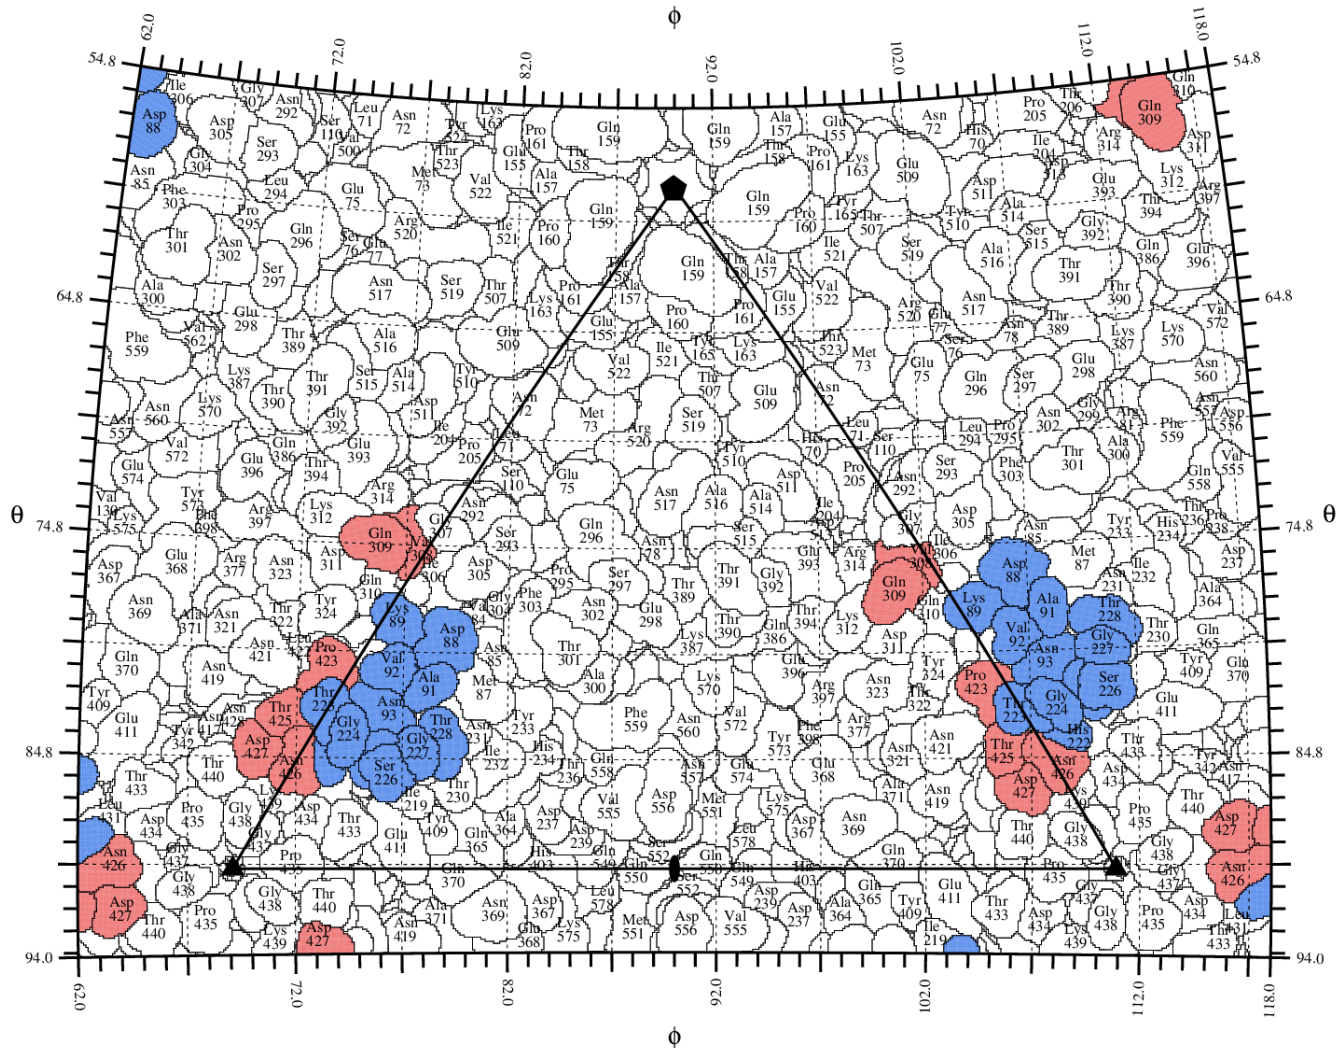

468

469

**Figure 3. Road map of the Fab 14 footprint on the CPV surface.** The capsid surface is shown as a

470

stereographic projection where the polar angles phi and theta represent the latitude and longitude of a

471

point on the virus surface (46). The virus surface is represented as a quilt of amino acids (47), and the

472

icosahedral asymmetric unit of the virus is indicated by the triangular boundary. The footprint of Fab 14

473

has contributions from symmetry-related copies of the capsid protein (red and blue) as in Fig. 2.

474

475

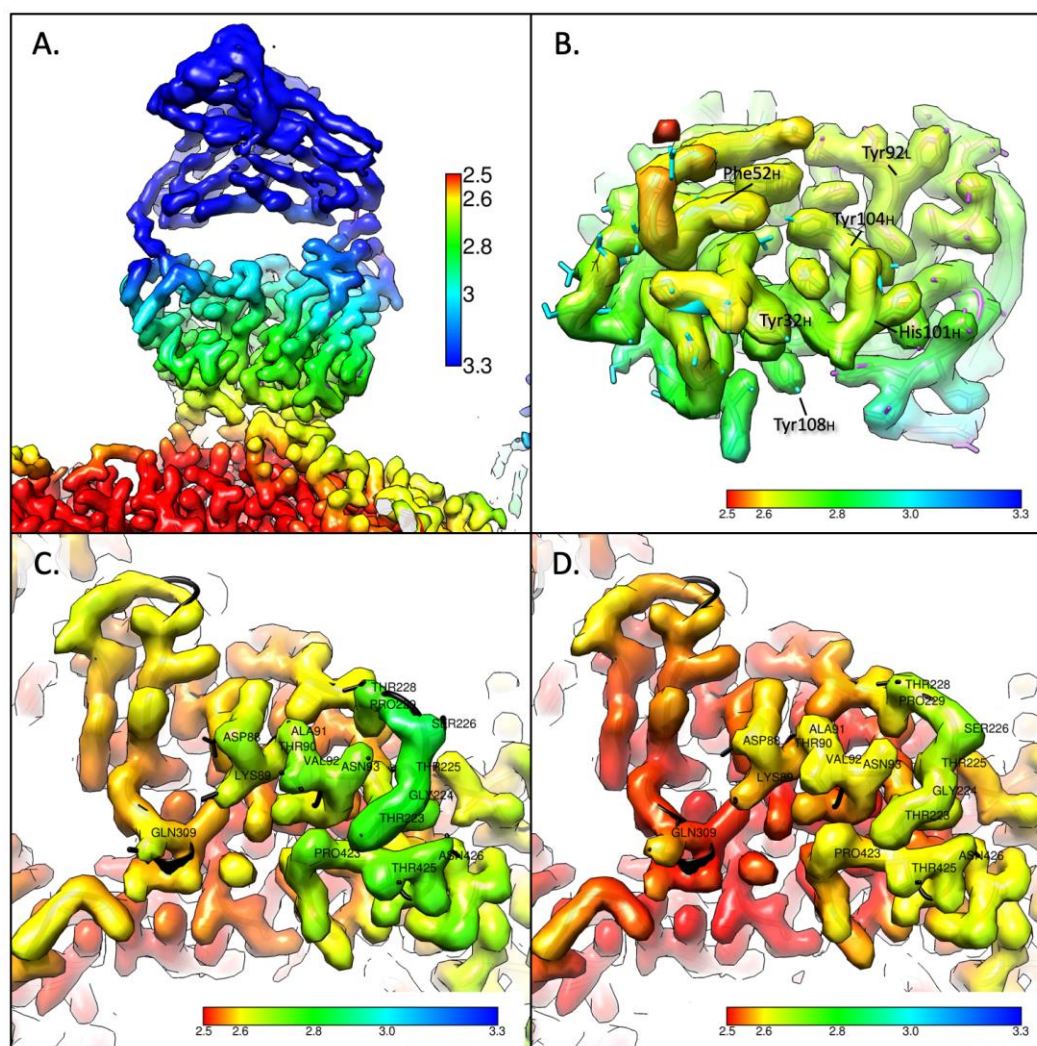

476

477 **Figure 4. Local resolution maps colored according to the resolution shown in the key in the first**  
478 **panel. A) The surface rendered map for the Fab reconstructed by subparticle classification shows that**  
479 **distal portions of the Fab have poorer resolution, likely due to flexibility of the elbow. B) The Fab map**  
480 **rotated 90° to show the region of contact with the virus has consistently good resolution of 2.6-2.8 Å. C)**  
481 **Region of contact on the virus capsid for unoccupied and occupied Fab binding illustrate that the Fab**  
482 **binding orders the density in the 228 loop. The overall resolution of the virus contact region is improved**  
483 **upon Fab binding suggesting the stabilization of the epitope.**

484

485

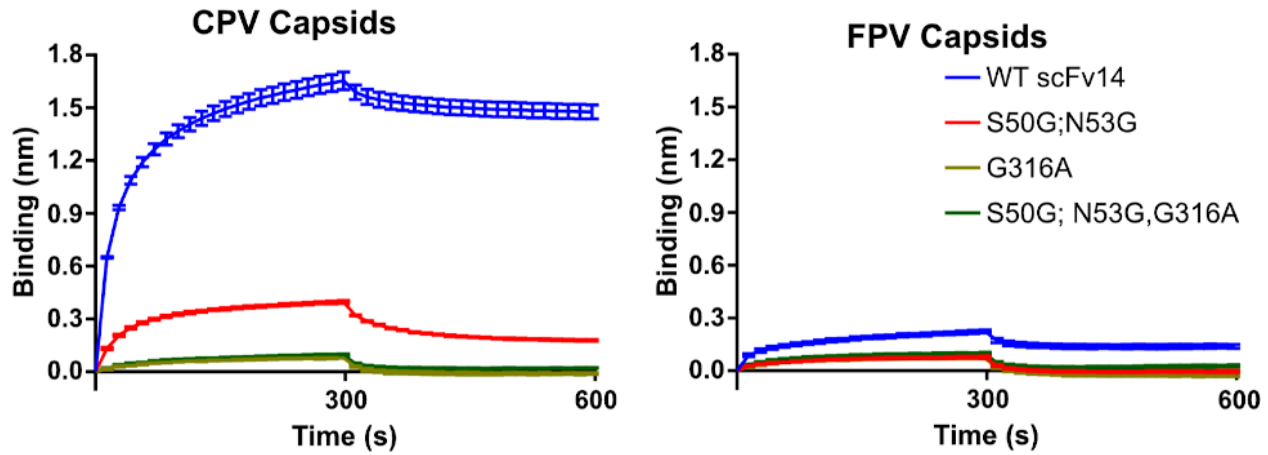

486

487 **Figure 5. Blitz binding data.** Levels of binding to (A) CPV or (B) FPV capsids of wildtype scFv of Fab  
488 14 or scFv14 variants with mutations in the complementarity determining region. Protein A biolayer  
489 interferometry probes were incubated with scFv-Fc to the same level of bound protein, washed,  
490 incubated with CPV-2 or FPV empty capsids, then incubated in buffer. Mutant scFv14 forms were  
491 Ser50Gly and Asn53Gly together, Gly316Ala alone, or all three mutations.

492

493



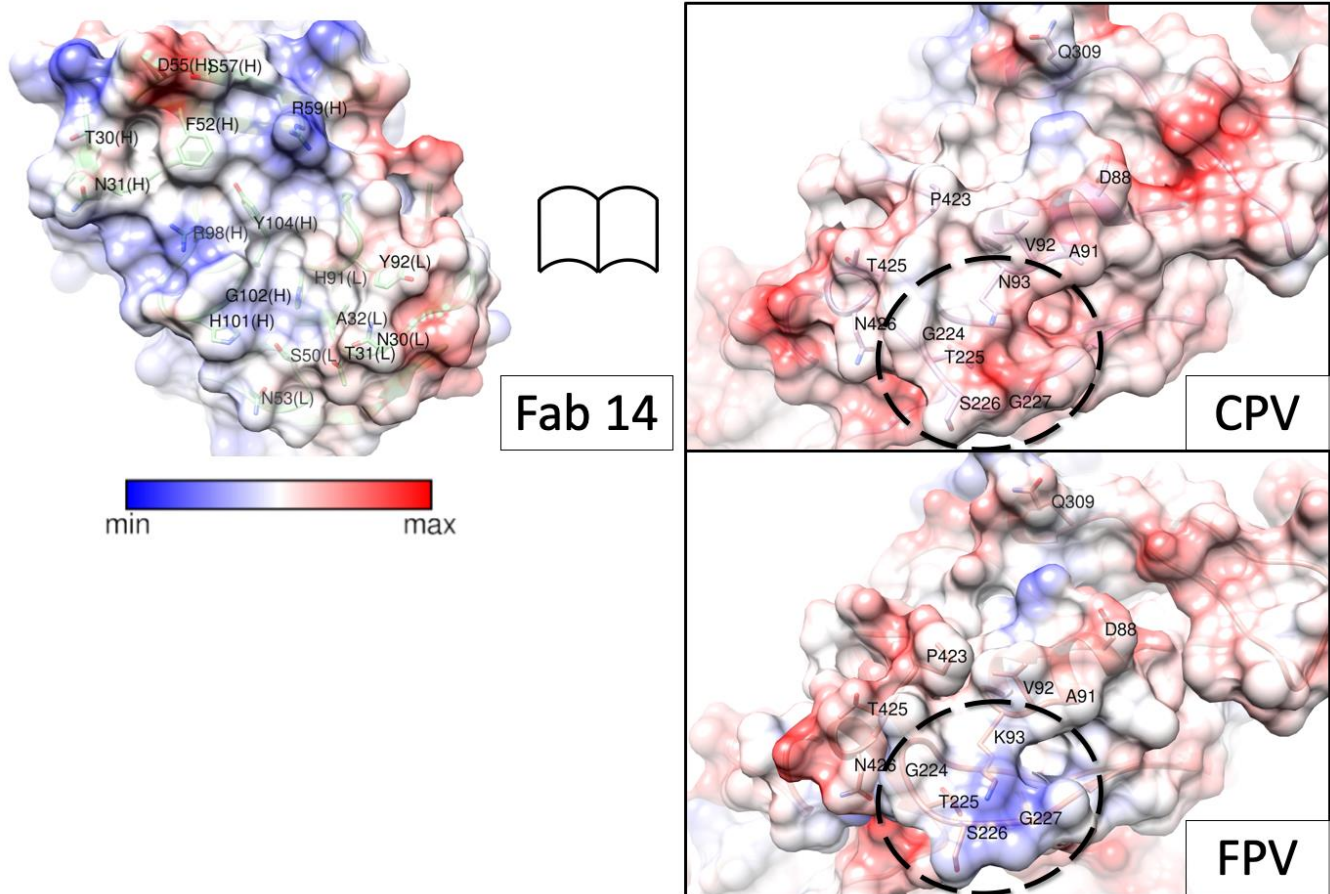

494

495 **Figure 6. Open book view of the binding interface.** Surface rendered maps depicted with columbic  
496 potential (key indicates blue is positive and red is negative charge) for Fab and CPV illustrate the  
497 complementarity of the binding surfaces outlined by dashed lines on virus capsid surface. For  
498 comparison, the same region of FPV was rendered and the change at residue 93 can be seen to alter  
499 the surface charge within the region that comprises the epitope.

500

501

502

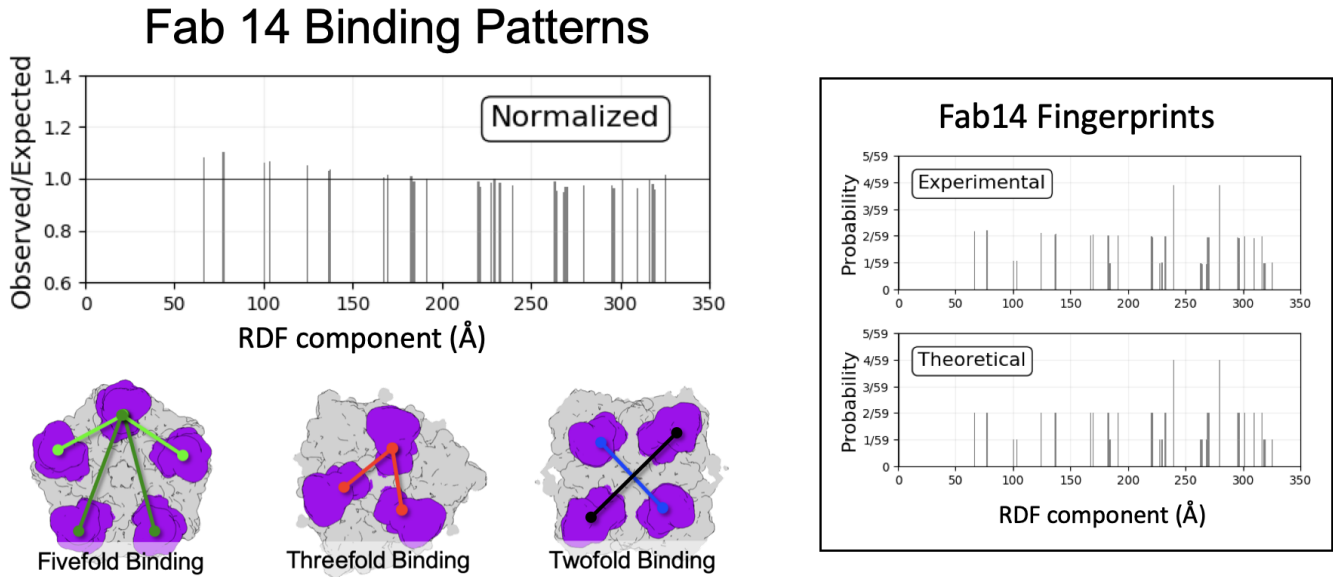

### Fab E Binding Patterns

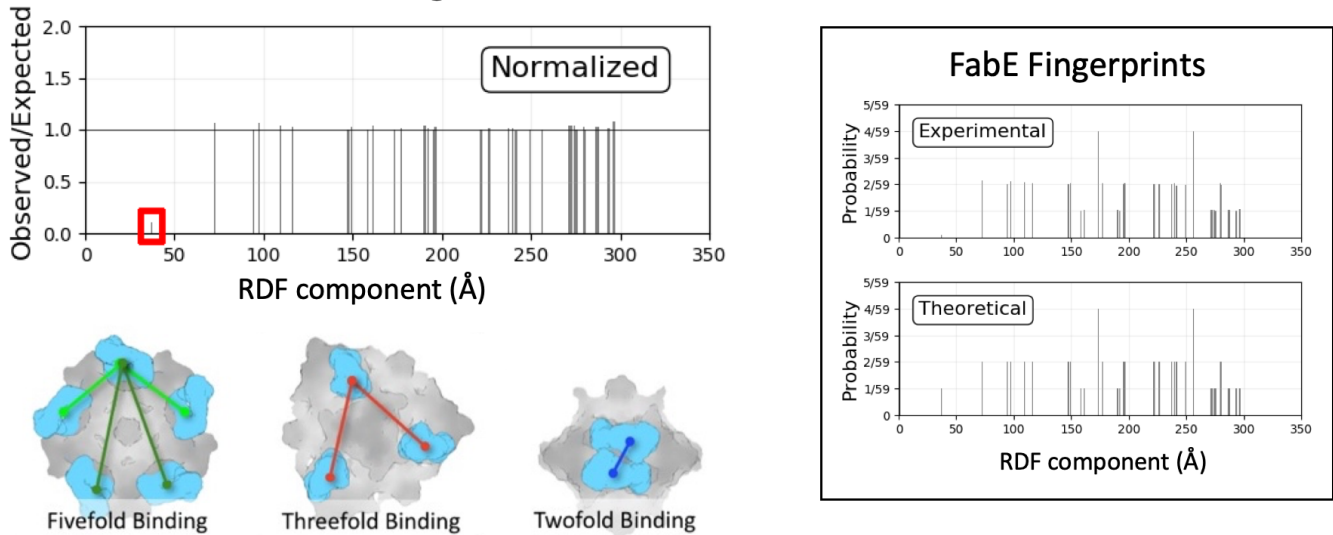

503

504

**Figure 7. Icosahedral Subparticle Extraction and Correlated Classification (ISECC). Binding**

505

Patterns for Fab 14 and Fab E are described as Radial Distribution Functions evaluated at binding

506

sites. For Fab 14 (top panel), a modest excess of proximal RDF components was detected after

507

normalization against a theoretical particle with unbiased binding. For Fab E, a severe deficit of the

508

most proximal RDF component was observed, consistent with twofold symmetry clash of Fab E.

509

Example geometry corresponding to RDF components are shown in each case.

510

511 **Supplementary Information**

512

513 **Table S1. Cryo-EM statistics**

| Fab Occupancy             | Symmetry                     | Microscope /Detector          | No. of micrographs | Defocus range (u.m.) | No. of particles selected | No. of particles used                              | Resolution (Å) |
|---------------------------|------------------------------|-------------------------------|--------------------|----------------------|---------------------------|----------------------------------------------------|----------------|
| Full-Fab<br>60 Fab/capsid | I2                           | FEI Polara,<br>Falcon<br>3EC  | 21,075             | 0.5 –<br>4.2         | 142,618                   | 95,353                                             | 3.2            |
| Low-Fab<br>10 Fab/capsid  | I2                           | Titan Krios,<br>Falcon<br>3EC | 2,265              | 0.7 –<br>4.9         | 316,808                   | 162,627                                            | 2.3            |
|                           | C1/<br>Symmetry<br>-mismatch | Titan Krios,<br>Falcon<br>3EC | 2,265              | 0.7 –<br>4.9         | 316,808                   | 162,627<br>* 10.2<br>orientati<br>ons/parti<br>cle | 2.4            |

514

515

516 **Table S2. Sequence of the Fab and ScFv**

517

518 **Light Chain**

519 DIVMTQSHKFMSTSVGDRVSITCKASQDVNTALAWYQQIPGQSPKLLIYSASNRYTGVPDRFTASGSGTDFTFTISSVQAEDLALYYCQQHYTPWTFGGGKLEIKRA--  
520 L1 L2 L3

521

522 **Heavy Chain**

523 ---  
524 GTELVKPGASAGVKLSCKASGYTFTNYDMNWVRQRPEQGLEWIGWIFPGDSTRYNEKFKGKATLTTDKSSSTAYQLNRLTSEDSAVYFCARRGSHGSYSFAYWGQGLVT  
525 VS---  
526 H1 H2 H3

527

528 Heavy and light chain sequences reported in one letter code with the chain loops underlined and  
529 designated. Yellow highlighted residues were identified as contacts with the virus surface in the 2.4 Å  
530 map.

531

532 **Table S3: Refinement and Validation Statistics**

533 **(a) Asymmetric Refinement: Fab-occupied epitope**

|                      | <b>VP2</b> | <b>Fab 14</b> | 534 |
|----------------------|------------|---------------|-----|
| <b>Refinement</b>    |            |               |     |
| Model composition    | Capsid asu | Fab           |     |
| Non-hydrogen atoms   | 4,238      | 1,766         |     |
| Protein residues     | 532        | 227           |     |
| Model-to-map fit     |            |               |     |
| CC_mask              | 0.8121     | 0.7989        |     |
| R.m.s. deviations    |            |               |     |
| Bond lengths (Å)     | 0.0054     | 0.0047        |     |
| Bond angles (°)      | 1.01       | 1.02          |     |
| Validation           |            |               |     |
| MolProbity score     | 1.57       | 2.74          |     |
| Clashscore           | 3.74       | 9.82          |     |
| Rotamer outliers (%) | 2.58       | 8.47          |     |
| Ramachandran plot    |            |               |     |
| Favored (%)          | 97.53      | 91.03         |     |
| Outliers (%)         | 0.19       | 0             |     |

535

536

537 **(b) Asymmetric Refinement: Fab-unoccupied epitope**

|                      | <b>VP2</b> |
|----------------------|------------|
| <b>Refinement</b>    |            |
| Model composition    | Capsid asu |
| Non-hydrogen atoms   | 4,238      |
| Protein residues     | 532        |
| Model-to-map fit     |            |
| CC_mask              | 0.8111     |
| R.m.s. deviations    |            |
| Bond lengths (Å)     | 0.0108     |
| Bond angles (°)      | 0.75       |
| Validation           |            |
| MolProbity score     | 2.14       |
| Clashscore           | 4.71       |
| Rotamer outliers (%) | 6.67       |
| Ramachandran plot    |            |
| Favored (%)          | 96.01      |
| Outliers (%)         | 0          |

538

539 **(c) Icosahedral Refinement: Low-Fab vs. Full-Fab data**

|                      | <b>VP2<sup>Low-Fab</sup></b> | <b>VP2<sup>Full-Fab</sup></b> | <b>Fab 14<sup>Full-Fab</sup></b> |
|----------------------|------------------------------|-------------------------------|----------------------------------|
| <b>Refinement</b>    |                              |                               |                                  |
| Model composition    | Capsid asu                   |                               | Fab                              |
| Non-hydrogen atoms   | 4,238                        |                               | 1,766                            |
| Protein residues     | 532                          |                               | 227                              |
| Model-to-map fit     |                              |                               |                                  |
| CC_mask              | 0.7831                       | 0.8545                        | 0.7162                           |
| R.m.s. deviations    |                              |                               |                                  |
| Bond lengths (Å)     | 0.0050                       | 0.010                         | 0.008                            |
| Bond angles (°)      | 0.99                         | 1.25                          | 1.17                             |
| Validation           |                              |                               |                                  |
| MolProbity score     | 1.72                         | 1.81                          | 1.96                             |
| Clashscore           | 4.35                         | 5.53                          | 6.93                             |
| Rotamer outliers (%) | 3.44                         | 0.21                          | 0.53                             |
| Ramachandran plot    |                              |                               |                                  |
| Favored (%)          | 97.53                        | 91.21                         | 88.79                            |
| Outliers (%)         | 0                            | 0.37                          | 0                                |

540 *All statistics generated via phenix.molprobity on phenix/1.14*

541

542

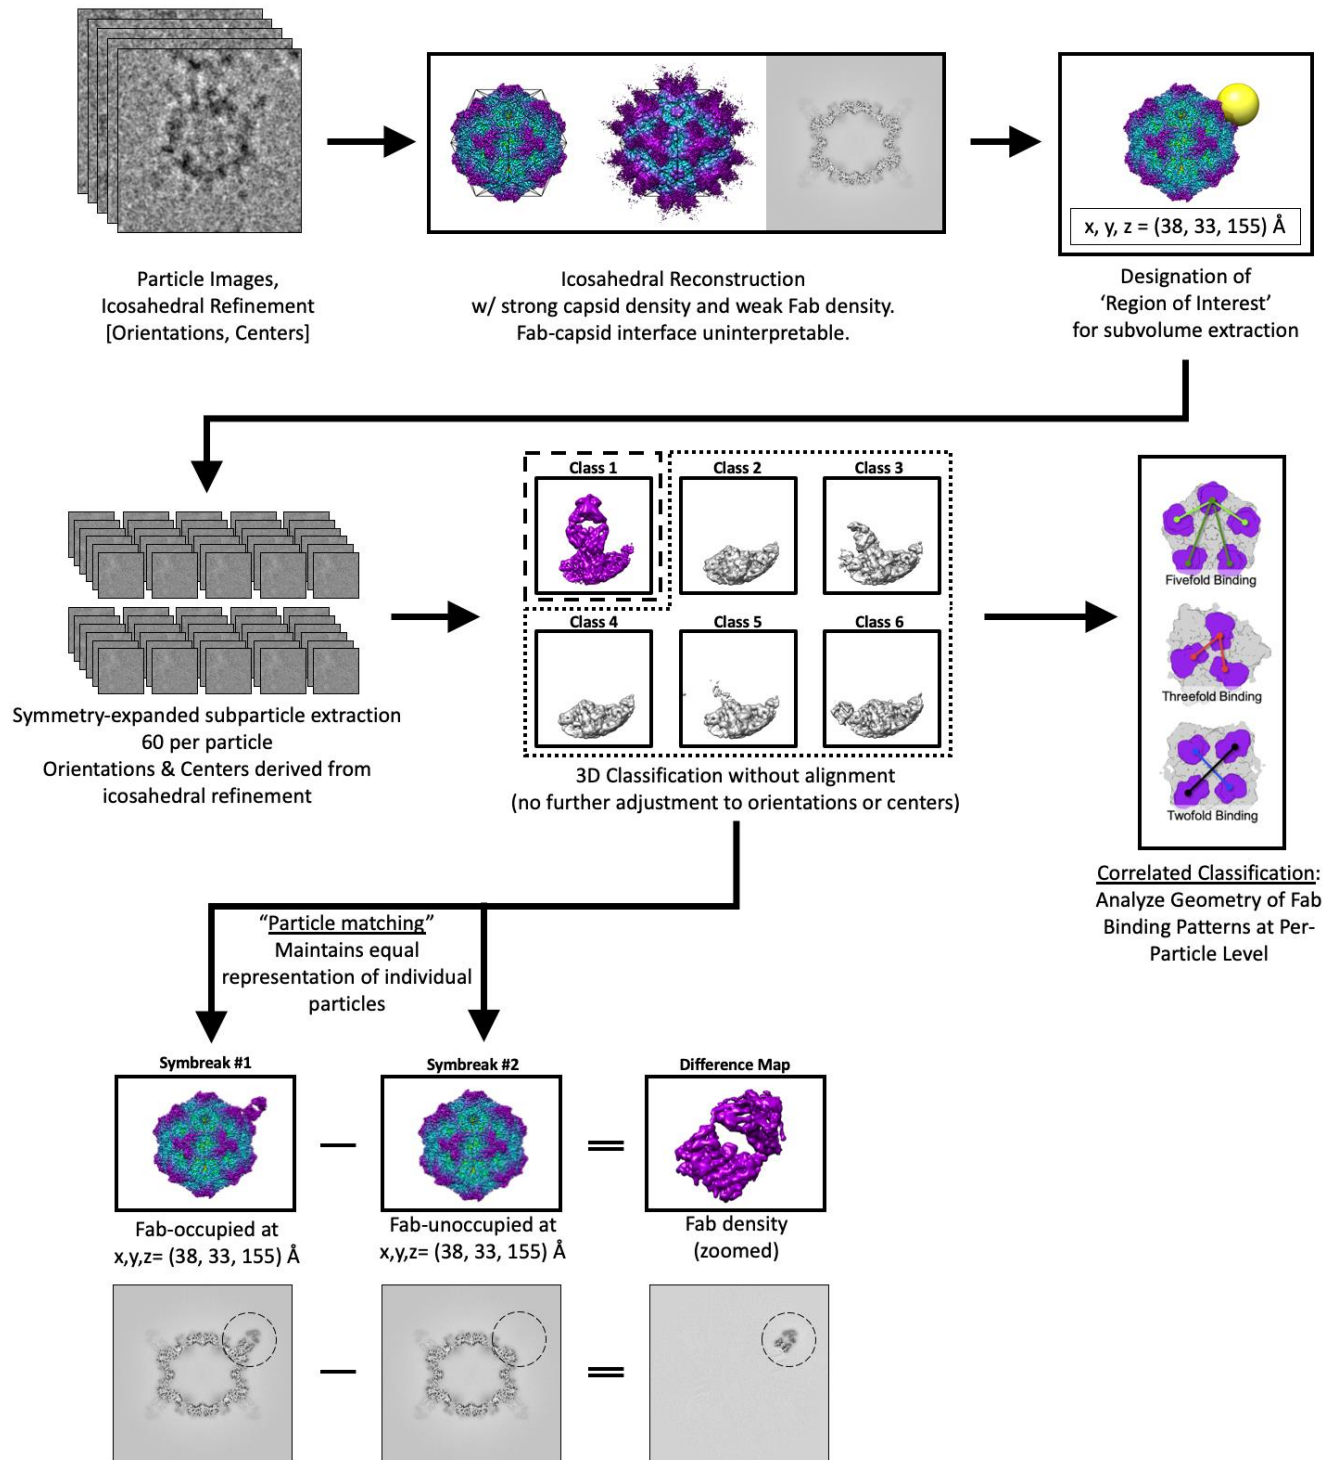

543

544 **S.Figure 1. Flow chart of the reconstruction and classification process.**

545

546

547

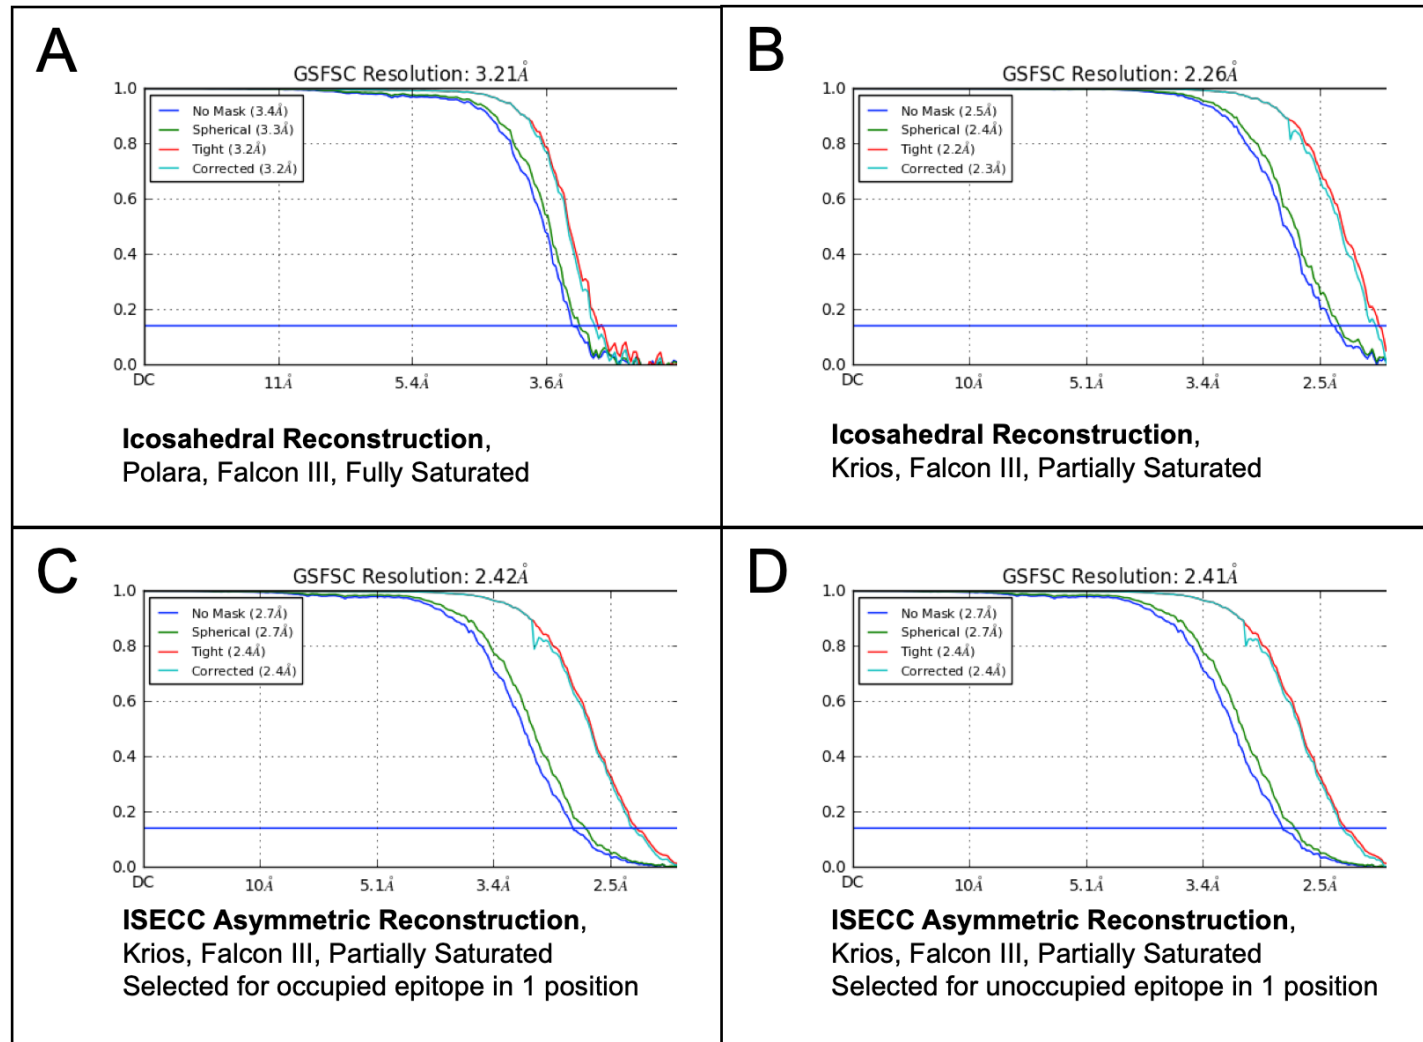

548

549 **S.Figure 2. Global FSC curves. (A, B)** Different instrumentation and sample preparations allowed the

550 partially saturated dataset to achieve higher resolution than the fully saturated dataset (2.3Å vs 3.2Å).

551 **(C,D)** Asymmetric symmetry-break operations sacrificed some of this resolution to resolve the capsid

552 the resolve a selected site on the capsid in the presence or absence of Fab (both 2.4Å global

553 resolution). Local resolution at the selected epitope is shown in Fig. 4.

554

555

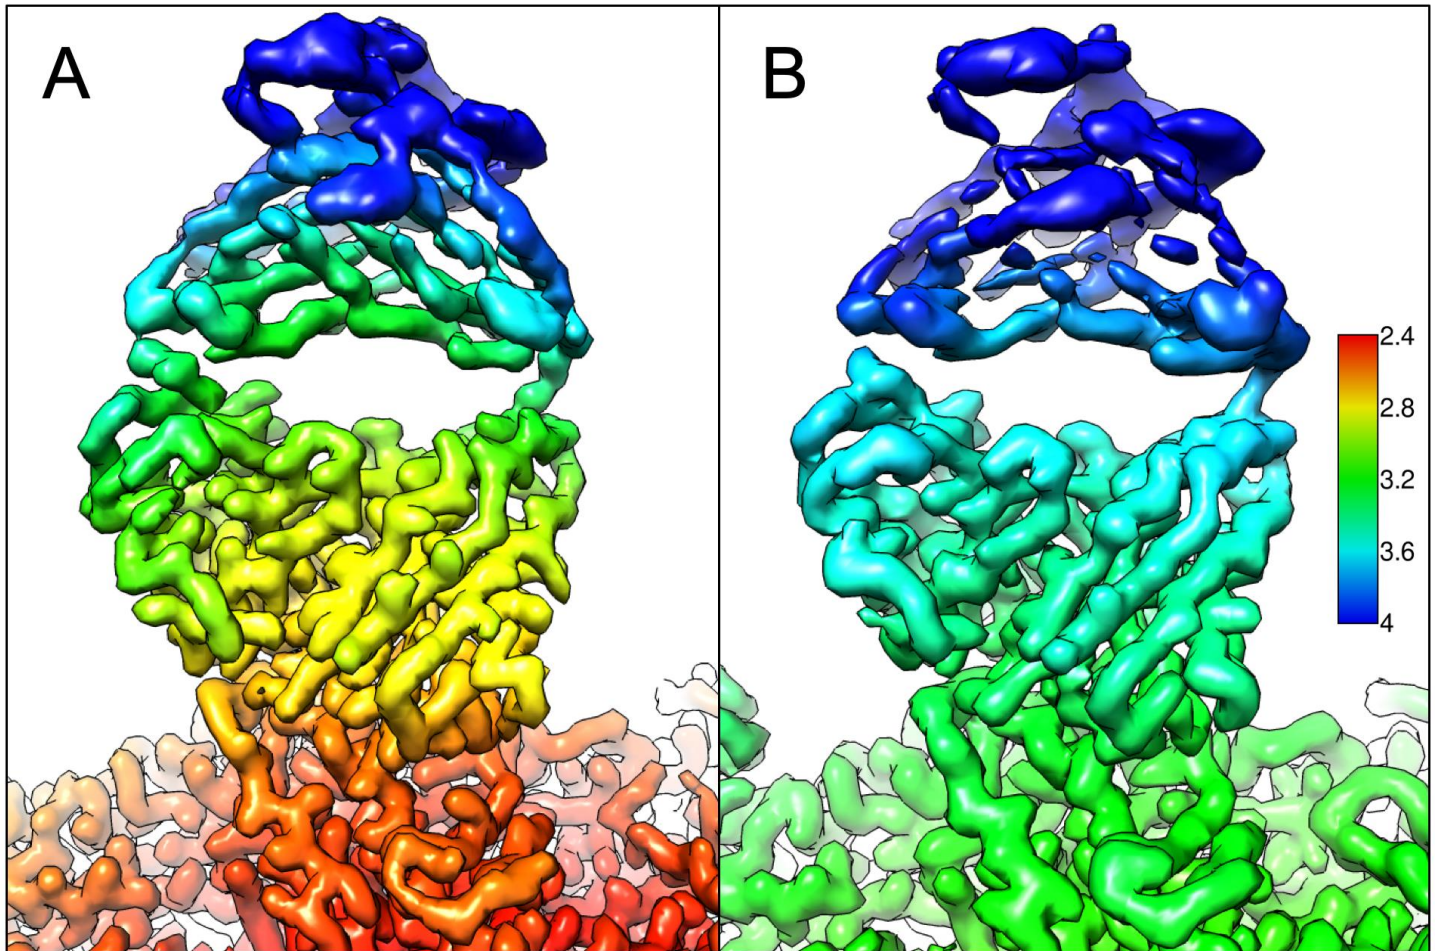

556  
557  
558  
559  
560

**S.Figure 3. Comparison of whole Fab structures.** Fab-density of the asymmetric low-Fab map colored by local resolution (A, left) was consistently better at the Fab-capsid interface than that of the full-fab icosahedrally averaged map (B, left).



## Fab #1 (No Clash)

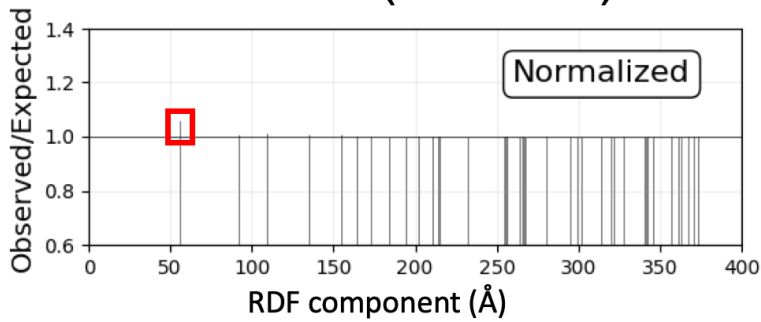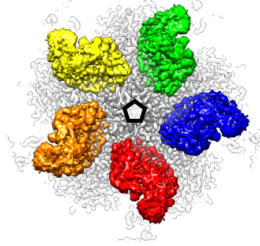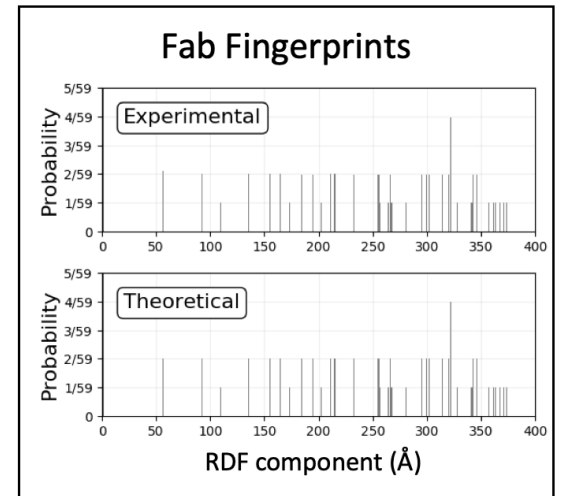

## Fab #2 (Threefold Clash)

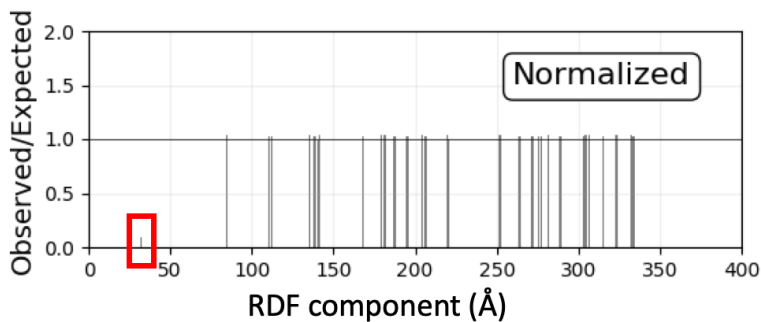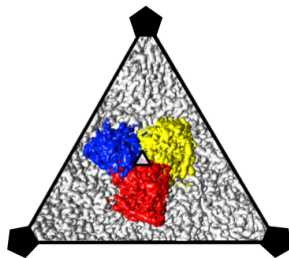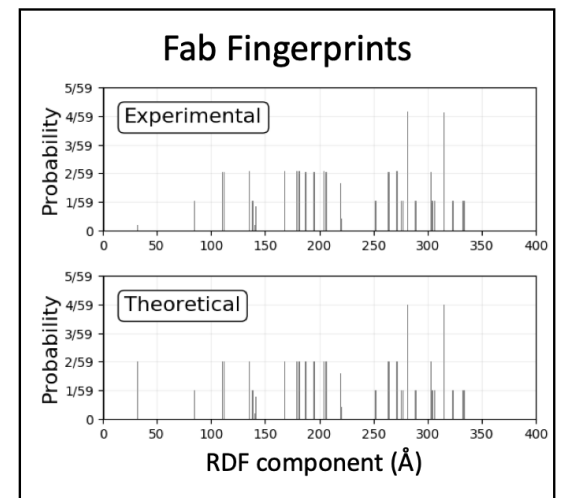

561

562 **S.Figure 4. Further validation of RDFs for clash analysis.** Two undersaturated enterovirus-Fab  
563 complexes are shown to demonstrate the impact of Fab binding geometry on cooperativity via RDF  
564 analysis. Fab #1 features no symmetry clash, with the closest interaction being the fivefold-relationship  
565 (top panel, Fab shown in red, orange, yellow, green, blue). Fab #2 features strong symmetry clash  
566 across the threefold symmetry axis (bottom panel, Fab shown in red, blue, yellow). The behavior of Fab  
567 #1 largely matched CPV-Fab 14, with a slight excess of the most proximal RDF component. Consistent  
568 with steric clash, the behavior of Fab #2 matched that of CPV-FabE.

569 Enterovirus-Fab structures and corresponding biological analysis will be published separately. They are  
570 shown as further validation of Fab fingerprints in assessing binding cooperativity.

571

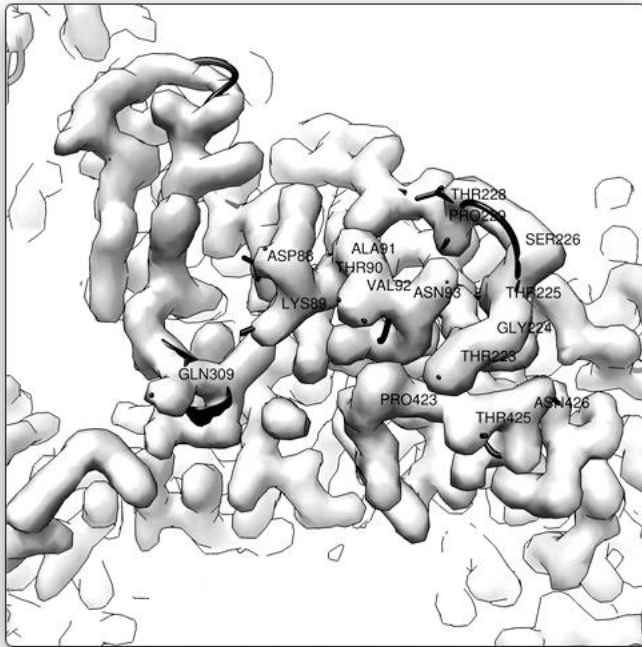

572

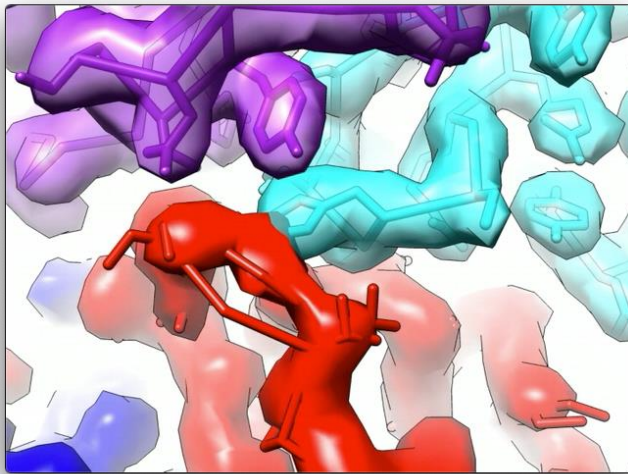

573

574

575

576

577

578

579

580

581

582

583

**S.Movie 1, 2. Occupied-Unoccupied epitope morph map.** Morphing between the two particle-matched asymmetric maps suggests subtle hinging of the 228 loop on VP2. Key residues in the Fab 14 epitope are labeled. The Fab density was segmented away to provide this top-down view of the epitope. For side view, density is colored as in Fig. 2.

584 **References**

585

- 586 1. Parrish CR, Kawaoka Y. 2005. The origins of new pandemic viruses: the acquisition of new host  
587 ranges by canine parvovirus and influenza A viruses. *Annu Rev Microbiol* 59:553–586.
- 588 2. Truyen U, Gruenberg A, Chang SF, Obermaier B, Veijalainen P, Parrish CR. 1995. Evolution of  
589 the feline-subgroup parvoviruses and the control of canine host range in vivo. *J Virol* 69:4702–  
590 4710.
- 591 3. Stucker KM, Pagan I, Cifuentes JO, Kaelber JT, Lillie TD, Hafenstein S, Holmes EC, Parrish CR.  
592 2012. The Role of Evolutionary Intermediates in the Host Adaptation of Canine Parvovirus. *J Virol*  
593 86:1514–1521.
- 594 4. Hoelzer K, Parrish CR. 2010. The emergence of parvoviruses of carnivores. *Vet Res* 41:39.
- 595 5. Kaelber JT, Demogines A, Harbison CE, Allison AB, Goodman LB, Ortega AN, Sawyer SL,  
596 Parrish CR. 2012. Evolutionary Reconstructions of the Transferrin Receptor of Caniforms  
597 Supports Canine Parvovirus Being a Re-emerged and Not a Novel Pathogen in Dogs. *PLoS*  
598 *Pathog* 8:e1002666.
- 599 6. Allison AB, Organtini LJ, Zhang S, Hafenstein SL, Holmes EC, Parrish CR. 2016. Single Mutations  
600 in the VP2 300 Loop Region of the Three-Fold Spike of the Carnivore Parvovirus Capsid Can  
601 Determine Host Range. *J Virol* 90:753–767.
- 602 7. VanBlargan LA, Goo L, Pierson TC. 2016. Deconstructing the Antiviral Neutralizing-Antibody  
603 Response: Implications for Vaccine Development and Immunity. *Microbiol Mol Biol Rev* MMBR  
604 80:989–1010.

- 605 8. Nelson CDS, Palermo LM, Hafenstein SL, Parrish CR. 2007. Different mechanisms of antibody-  
606 mediated neutralization of parvoviruses revealed using the Fab fragments of monoclonal  
607 antibodies. *Virology* 361:283–293.
- 608 9. Mietzsch M, Péntzes JJ, Agbandje-McKenna M. 2019. Twenty-Five Years of Structural  
609 Parvovirology. *Viruses* 11.
- 610 10. Tsao J, Chapman MS, Agbandje M, Keller W, Smith K, Wu H, Luo M, Smith TJ, Rossmann MG,  
611 Compans RW. 1991. The three-dimensional structure of canine parvovirus and its functional  
612 implications. *Science* 251:1456–1464.
- 613 11. Parrish CR, Carmichael LE. 1983. Antigenic structure and variation of canine parvovirus type-2,  
614 feline panleukopenia virus, and mink enteritis virus. *Virology* 129:401–414.
- 615 12. Strassheim ML, Gruenberg A, Veijalainen P, Sgro JY, Parrish CR. 1994. Two dominant  
616 neutralizing antigenic determinants of canine parvovirus are found on the threefold spike of the  
617 virus capsid. *Virology* 198:175–184.
- 618 13. Hafenstein S, Bowman VD, Sun T, Nelson CDS, Palermo LM, Chipman PR, Battisti AJ, Parrish  
619 CR, Rossmann MG. 2009. Structural comparison of different antibodies interacting with parvovirus  
620 capsids. *J Virol* 83:5556–5566.
- 621 14. Govindasamy L, Hueffer K, Parrish CR, Agbandje-McKenna M. 2003. Structures of host range-  
622 controlling regions of the capsids of canine and feline parvoviruses and mutants. *J Virol*  
623 77:12211–12221.
- 624 15. Hueffer K, Govindasamy L, Agbandje-McKenna M, Parrish CR. 2003. Combinations of two capsid  
625 regions controlling canine host range determine canine transferrin receptor binding by canine and  
626 feline parvoviruses. *J Virol* 77:10099–10105.

- 627 16. Chang SF, Sgro JY, Parrish CR. 1992. Multiple amino acids in the capsid structure of canine  
628 parvovirus coordinately determine the canine host range and specific antigenic and  
629 hemagglutination properties. *J Virol* 66:6858–6867.
- 630 17. Wu H, Rossmann MG. 1993. The canine parvovirus empty capsid structure. *J Mol Biol* 233:231–  
631 244.
- 632 18. Simpson AA, Chandrasekar V, Hébert B, Sullivan GM, Rossmann MG, Parrish CR. 2000. Host  
633 range and variability of calcium binding by surface loops in the capsids of canine and feline  
634 parvoviruses. *J Mol Biol* 300:597–610.
- 635 19. Hafenstein S, Bowman VD, Sun T, Nelson CDS, Palermo LM, Chipman PR, Battisti AJ, Parrish  
636 CR, Rossmann MG. 2009. Structural comparison of different antibodies interacting with parvovirus  
637 capsids. *J Virol* 83:5556–5566.
- 638 20. Dunbar CA, Callaway HM, Parrish CR, Jarrold MF. 2018. Probing Antibody Binding to Canine  
639 Parvovirus with Charge Detection Mass Spectrometry. *J Am Chem Soc* 140:15701–15711.
- 640 21. Lindner JM, Cornacchione V, Sathe A, Be C, Srinivas H, Riquet E, Leber X-C, Hein A, Wrobel MB,  
641 Scharenberg M, Pietzonka T, Wiesmann C, Abend J, Traggiai E. 2019. Human Memory B Cells  
642 Harbor Diverse Cross-Neutralizing Antibodies against BK and JC Polyomaviruses. *Immunity*  
643 50:668-676.e5.
- 644 22. Gurda BL, DiMattia MA, Miller EB, Bennett A, McKenna R, Weichert WS, Nelson CD, Chen W,  
645 Muzyczka N, Olson NH, Sinkovits RS, Chiorini JA, Zolotutkhin S, Kozyreva OG, Samulski RJ,  
646 Baker TS, Parrish CR, Agbandje-McKenna M. 2013. Capsid antibodies to different adeno-  
647 associated virus serotypes bind common regions. *J Virol* 87:9111–9124.

- 648 23. Agbandje M, McKenna R, Rossmann MG, Strassheim ML, Parrish CR. 1993. Structure  
649 determination of feline panleukopenia virus empty particles. *Proteins* 16:155–171.
- 650 24. Palermo LM, Hafenstein SL, Parrish CR. 2006. Purified feline and canine transferrin receptors  
651 reveal complex interactions with the capsids of canine and feline parvoviruses that correspond to  
652 their host ranges. *J Virol* 80:8482–8492.
- 653 25. Zhang K. 2016. Gctf: Real-time CTF determination and correction. *J Struct Biol* 193:1–12.
- 654 26. Scheres SHW. 2012. RELION: implementation of a Bayesian approach to cryo-EM structure  
655 determination. *J Struct Biol* 180:519–530.
- 656 27. Punjani A, Rubinstein JL, Fleet DJ, Brubaker MA. 2017. cryoSPARC: algorithms for rapid  
657 unsupervised cryo-EM structure determination. *Nat Methods* 14:290–296.
- 658 28. Emsley P, Cowtan K. 2004. Coot: model-building tools for molecular graphics. *Acta Crystallogr D*  
659 *Biol Crystallogr* 60:2126–2132.
- 660 29. Adams PD, Afonine PV, Bunkóczi G, Chen VB, Davis IW, Echols N, Headd JJ, Hung L-W, Kapral  
661 GJ, Grosse-Kunstleve RW, McCoy AJ, Moriarty NW, Oeffner R, Read RJ, Richardson DC,  
662 Richardson JS, Terwilliger TC, Zwart PH. 2010. PHENIX: a comprehensive Python-based system  
663 for macromolecular structure solution. *Acta Crystallogr D Biol Crystallogr* 66:213–221.
- 664 30. Chen VB, Arendall WB, Headd JJ, Keedy DA, Immormino RM, Kapral GJ, Murray LW, Richardson  
665 JS, Richardson DC. 2010. MolProbity: all-atom structure validation for macromolecular  
666 crystallography. *Acta Crystallogr D Biol Crystallogr* 66:12–21.
- 667 31. Ilca SL, Kotecha A, Sun X, Poranen MM, Stuart DI, Huiskonen JT. 2015. Localized reconstruction  
668 of subunits from electron cryomicroscopy images of macromolecular complexes. *Nat Commun*  
669 6:8843.

- 670 32. Lauver MD, Goetschius DJ, Netherby-Winslow CS, Ayers KN, Jin G, Haas DG, Frost EL, Cho SH,  
671 Bator CM, Bywaters SM, Christensen ND, Hafenstein SL, Lukacher AE. 2020. Antibody escape by  
672 polyomavirus capsid mutation facilitates neurovirulence. *eLife* 9.
- 673 33. Sanchez-Garcia R, Gomez-Blanco J, Cuervo A, Carazo JM, Sorzano COS, Vargas J. 2020.  
674 DeepEMhancer: a deep learning solution for cryo-EM volume post-processing. *bioRxiv*  
675 2020.06.12.148296.
- 676 34. Ludtke SJ, Baldwin PR, Chiu W. 1999. EMAN: semiautomated software for high-resolution single-  
677 particle reconstructions. *J Struct Biol* 128:82–97.
- 678 35. Callaway HM, Welsch K, Weichert W, Allison AB, Hafenstein SL, Huang K, Iketani S, Parrish CR.  
679 2018. Complex and Dynamic Interactions between Parvovirus Capsids, Transferrin Receptors,  
680 and Antibodies Control Cell Infection and Host Range. *J Virol* 92.
- 681 36. Pettersen EF, Goddard TD, Huang CC, Couch GS, Greenblatt DM, Meng EC, Ferrin TE. 2004.  
682 UCSF Chimera--a visualization system for exploratory research and analysis. *J Comput Chem*  
683 25:1605–1612.
- 684 37. Govindasamy L, Hueffer K, Parrish CR, Agbandje-McKenna M. 2003. Structures of host range-  
685 controlling regions of the capsids of canine and feline parvoviruses and mutants. *J Virol*  
686 77:12211–12221.
- 687 38. Organtini LJ, Lee H, Iketani S, Huang K, Ashley RE, Makhov AM, Conway JF, Parrish CR,  
688 Hafenstein S. 2016. Near-Atomic Resolution Structure of a Highly Neutralizing Fab Bound to  
689 Canine Parvovirus. *J Virol* 90:9733–9742.
- 690 39. Chapman MS, Rossmann MG. 1995. Single-stranded DNA-protein interactions in canine  
691 parvovirus. *Struct Lond Engl* 1993 3:151–162.

- 692 40. Palermo LM, Hafenstein SL, Parrish CR. 2006. Purified feline and canine transferrin receptors  
693 reveal complex interactions with the capsids of canine and feline parvoviruses that correspond to  
694 their host ranges. *J Virol* 80:8482–8492.
- 695 41. Wang W, Ye W, Yu Q, Jiang C, Zhang J, Luo R, Chen H-F. 2013. Conformational selection and  
696 induced fit in specific antibody and antigen recognition: SPE7 as a case study. *J Phys Chem B*  
697 117:4912–4923.
- 698 42. Sinha N, Smith-Gill SJ. 2005. Molecular dynamics simulation of a high-affinity antibody-protein  
699 complex: the binding site is a mosaic of locally flexible and preorganized rigid regions. *Cell*  
700 *Biochem Biophys* 43:253–273.
- 701 43. Rini JM, Schulze-Gahmen U, Wilson IA. 1992. Structural evidence for induced fit as a mechanism  
702 for antibody-antigen recognition. *Science* 255:959–965.
- 703 44. Parker JS, Parrish CR. 1997. Canine parvovirus host range is determined by the specific  
704 conformation of an additional region of the capsid. *J Virol* 71:9214–9222.
- 705 45. Llamas-Saiz AL, Agbandje-McKenna M, Parker JS, Wahid AT, Parrish CR, Rossmann MG. 1996.  
706 Structural analysis of a mutation in canine parvovirus which controls antigenicity and host range.  
707 *Virology* 225:65–71.
- 708 46. Xiao C, Rossmann MG. 2007. Interpretation of electron density with stereographic roadmap  
709 projections. *J Struct Biol* 158:182–187.
- 710 47. Rossmann MG, Palmenberg AC. 1988. Conservation of the putative receptor attachment site in  
711 picornaviruses. *Virology* 164:373–382.

712
